## 32 **Introduction**

33 Biomaterials and devices implanted in the body have a broad spectrum of clinical  
34 applications including tissue regeneration (1), cell transplantation (2), controlled drug  
35 release (3), continuous monitoring of physiological conditions (4) and electronic pacing (5).  
36 In tissue engineering, the key components of the cell microenvironment include  
37 neighboring cells, soluble factors, the surrounding ECM, and biophysical fields, regulating  
38 cell behaviors and functions like spreading, migration, self-renewal, differentiation, and  
39 apoptosis. (6, 7) Among them, structural features (macroscale, microscale and nanoscale  
40 features) play critical roles in guiding cell behaviors. (8) Electrospinning technology has  
41 been widely applied in preparing scaffolds due to its simplicity, capacity to form fibers on  
42 the micro- and nanoscale, structural control of electrospun membranes and  
43 cost-effectiveness.(9) By changing the surface architectures and distribution of collectors,  
44 electrospun nanofibers could be assembled into well-ordered nanofiber meshes with  
45 different morphology, e.g. parallel alignment or latticed patterns of nanofibers (10, 11), and  
46 have been preferentially applied to the regeneration of diverse tissues like skin and bone  
47 (11, 12).Upon implantation of a material, cells of both the innate and adaptive immune  
48 system have a role in the host response. (13) Previous studies illustrated the type 1  
49 (pro-inflammatory) immune polarization driven by T helper 1 (Th1) cells from the adaptive  
50 immune system, and the induced pro-inflammatory M1 activation of macrophages  
51 (stimulated by IL-2 and IFN- $\gamma$  from Th1 cells). By contrast, in type 2 immune response, T  
52 helper 2 (Th2) cells produce cytokines like IL-4 and IL-13, which regulate the polarization  
53 of macrophages towards an anti-inflammatory M2 activation. (14, 15) More recently, a  
54 type 17 immune response was reported to promote chronic fibrosis in tissue around  
55 implants. IL-17 secreted by group 3 innate lymphoid cells,  $\gamma\delta$  T cells and CD4+ adaptive T  
56 cells (Th17) can modulate extracellular matrix organization and fibrosis. (16, 17) Previous  
57 studies usually focused on certain types of immune cells, like macrophages, and explored  
58 their roles in the host response. However, the immune response is concomitantly  
59 regulated by various immune cells, whose phenotype and function are dictated by  
60 external and internal signals. An overview of different immune cells in the  
61 microenvironment will aid in comprehensive understanding of the immune responses

62 elicited by scaffolds. Technological advances such as single-cell RNA sequencing  
63 (scRNA-seq) (18, 19) have significantly advanced the knowledge of the immune system.  
64 (20) Heterogeneity of cell populations, functions, and the nuances of their phenotypes in  
65 vivo can be revealed at a high resolution. By changing the collector, we developed  
66 poly(lactic-co-glycolic acid)-fish collagen (PLGA-FC) hybrid electrospun scaffolds with  
67 three types of surface topography, i.e. the group with randomly oriented fibers (Random  
68 group), the group with mesh-like topography in macroscale and randomly oriented fibers  
69 in microscale (Latticed group), and the group with aligned fibers (Aligned group). We  
70 explored the regenerative outcomes of these scaffolds in rat/mouse dorsal skin excisional  
71 wounds, and evaluated their immunomodulatory properties. The scaffold with the best  
72 performance was further investigated. Immune microenvironment around the scaffold was  
73 probed by scRNA-seq. Heterogeneity of keratinocytes, fibroblasts, and immune cell  
74 populations, cellular functions, and their interactions in vivo were explored.

## 75 **Results**

### 76 **Surface morphology and biophysical properties of electrospun membranes**

77 As shown in Fig.1A, we obtained scaffolds with random, aligned or latticed patterns of  
78 fibers. Macroscale topography of the Latticed group was in line with the chess-like wire  
79 net collector, characterized by mesh-like patterns. While the Random and Aligned group  
80 presented smooth surface. In microscale, both Random group and Latticed group had a  
81 random distribution of fibers caused by the chaotic motion of polymeric solution during the  
82 electrospinning process. In the Aligned group, fibers appeared uniaxially aligned with  
83 most fibers (> 90%) presenting an orientation excursion smaller than 10°. The orientation  
84 was realized through the drawing forces from the rotating collector. Wettability of the  
85 membranes was investigated by water contact angle (WCA) analysis. Membranes in  
86 Random and Latticed group exhibited significantly larger WCA values than those in  
87 Aligned group, indicating higher hydrophilicity for aligned membranes. (fig. S1A)  
88 Mechanical tests showed that the aligned membranes had the largest tensile stress. (fig.  
89 S1B) The viability of L929 and HOK cells seeded on three types of membranes were  
90 similar, and the scaffolds did not exert negative influence on cell proliferation at 1, 3 and 5

91 days after co-culture. (fig. S1C-D)

## 92 **Evaluation of wound healing in a rat skin wound model**

93 Residual wound area reduction

94 Scaffolds with random, aligned and latticed topography were placed below the  
95 full-thickness exisional wound (diameter=6mm) on rat dorsal skin. (Fig. 1B, C) Wound  
96 area reduction became apparent as early as day 5. (Fig. 1D, E) Wound healing rates were  
97 significantly accelerated by the aligned membranes, the group with the lowest residual  
98 wound area ( $53.84\pm 6.93\%$ ). On day 7, the Aligned group still showed significantly faster  
99 wound healing, achieving the lowest residual wound area ( $22.45\pm 1.52\%$ ), followed by the  
100 Random group ( $28.02\pm 7.16\%$ ) and Saline group ( $35.09\pm 2.51\%$ ). The Latticed group  
101 showed delayed wound healing with the largest residual wound area at day 5 ( $78.96\pm$   
102  $4.06\%$ ) and day 7 ( $40.73\pm 3.14\%$ ). On day 14, basically all groups achieved complete  
103 closure of the wound. (Fig. 1E)

## 104 **Re-epithelialization**

105 Re-epithelialization is realized by keratinocytes migrating from wound edge over to the  
106 denuded area. (21) Samples of the wound site tissue were harvested on day 7, 14, and 28.  
107 H&E staining and Masson's trichrome staining revealed that on day 7, the Aligned group  
108 presented the fastest coverage of the wound, leaving the smallest gap width. (Fig. 1F, G,  
109 fig. S2) Above the scaffolds, surrounding epithelium formed migrating epithelial tongue as  
110 the first layer advancing towards the wound. The regenerated epithelium took on stratified  
111 structure, resembling normal epithelium. (Fig. 1F) The latticed membrane appeared to  
112 impede the advancement of surrounding tissue, generating larger gap width than Saline  
113 control. Immunofluorescent staining for Krt5 (keratin secreted by keratinocytes in the  
114 basal layer) and Krt10 (keratin secreted by differentiated keratinocytes in the suprabasal  
115 layers) (21) confirmed the formation of stratified epithelium in the Aligned and Random  
116 group on day 7. (Fig. 1H) In regenerated epithelium, the proportion of Krt5-positive area  
117 versus Krt10-positive area was calculated to evaluate maturation of the epithelium.  
118 Aligned group had the largest area of keratinized epithelium, and more keratinocytes were

119 undifferentiated (Krt5-positive) (Fig. 1I). At day 14, re-epithelialization was completed in all  
120 groups except for the Latticed group, where a small defect in the central zone was still  
121 present. All groups showed matured stratified epithelium.

### 122 **Regeneration of dermis and cutaneous appendages**

123 On day 7, the wound space below epithelium was filled with granulation tissue,  
124 characterized by infiltration of inflammatory cells and fibroblasts, deposition of collagen  
125 fibers, and formation of capillaries. (Fig. 1F, fig. S2) Increased deposition of collagen was  
126 observed on day 14 and 28. (fig. S2) On day 28, cutaneous appendages, including hair  
127 follicles and sebaceous glands, were typically reduced at wound site compared to normal  
128 skin. The Aligned group had more regenerated hair follicles and sebaceous glands than  
129 other treatment groups. (Fig. 1F)

### 130 **Fibrotic capsule formation and inflammatory cell infiltration of implanted scaffolds**

131 To evaluate host response against biomaterials, the scaffolds were placed  
132 subcutaneously in rats. Fibrotic encapsulation of implanted membranes formed as early  
133 as 3 days post-implantation. The thickness of fibrotic capsules was measured at day 3, 7  
134 and 14 (Fig. 1J), and the Aligned group had the smallest fibrotic capsule thickness at all  
135 time points. (Fig. 1K) There was remarkable inflammatory cell infiltration into random and  
136 latticed membranes on day 3, whereas cell penetration into the aligned membranes was  
137 scarce (fig. S3). Then on day 7, immune cell infiltration into scaffolds was seen in all  
138 groups. Multinucleated foreign body giant cells (FBGCs) lined up on the surface of  
139 random and latticed membranes, whereas fewer FBGCs formed on aligned membranes.  
140 On day 14, the aligned scaffold was surrounded by fewer FBGCs compared with other  
141 scaffolds.

### 142 **Bulk-tissue RNA-Seq for three groups revealed differences in immunomodulatory** 143 **properties**

144 We performed bulk-tissue RNA-Seq in samples of rat cutaneous wound on day 7 (3  
145 samples for each group). The RNA-Seq analysis identified transcripts corresponding to  
146 34459 genes, distributed over 6 orders of magnitude of expression level. Principal  
147 component analysis (PCA) of the data showed that transcriptome of wounded tissue  
148 differed from that of normal rat skin. (Fig. 1L) An aggregation of the Latticed and Saline

149 samples on PCA graph suggested that gene expression profiles of these two groups were  
150 similar. While the Random and Aligned samples were closer. (Fig. 1L) According to Gene  
151 ontology (GO) analysis, random and aligned scaffolds induced up-regulated expression of  
152 genes associated with immune responses, when compared with the Saline samples. (Fig.  
153 1M) However, when the Latticed group was compared to Saline group, no immuno-related  
154 gene sets were found among the significantly up-regulated genes, indicating that the  
155 latticed membrane did not exert immunomodulatory effects on the wound  
156 microenvironment. Kyoto Encyclopedia of Genes and Genomes (KEGG) analysis showed  
157 gene enrichment in the pathway “Cytokine-cytokine receptor interaction” (KEGGID  
158 rno04060) (Random vs Aligned, up-regulated, padj=0.025; Aligned vs Saline,  
159 up-regulated, padj=0.000). The up-regulated gene loci were shown in fig. S4A. The  
160 CXCL9, -10, -11/CXCR3 axis, a chemokine signaling, regulates immune cell migration,  
161 differentiation, and activation. (22) Normalized gene expression (Fragments Per Kilobase  
162 Million, FPKM) of CXCL9, -10, -11 and CXCR3 were higher in the Random and Aligned  
163 groups compared with that in the Saline group (fig. S4B). Real-time Quantitative  
164 Polymerase Chain Reaction (qPCR) further confirmed the chemotactic effects observed in  
165 Aligned and Random groups, with higher gene expression of macrophage or T cell related  
166 genes in these two groups (fig. S4C). Results of RNA-Seq analysis suggested that  
167 random and aligned membranes were able to modulate the local immune  
168 microenvironment. To explore whether the scaffolds had similar performance in other  
169 species, we further applied them in mouse skin wound model.

### 170 **Wound healing in mouse**

171 We placed three types of scaffolds below the full-thickness excisional wound  
172 (diameter=6mm) of mouse dorsal skin. (Fig. 2A, B) Wound coverage was faster in the  
173 Aligned (residual wound area=29.29±4.81%) and Saline group (residual wound  
174 area=20.80±4.66%) until day 7. The Random group showed delayed wound healing,  
175 characterized by the largest residual wound area (51.58±16.15%). On day 14, basically all  
176 groups achieved complete closure of the wound (Fig. 2C, D). On day 7, epithelial tongues  
177 advanced towards the wound area, leaving the smallest gap width in the Aligned group,  
178 followed by the Saline group. (Fig. 2E, F) On day 14, re-epithelialization was completed in

179 all groups except for some samples of the Latticed group, where a small defect in the  
180 central zone was still present. All groups showed matured stratified epithelium.  
181 Regeneration of hair follicles was seen in Aligned samples after 14 days of wound healing  
182 (Fig. 2E). Scaffolds were also placed subcutaneously to evaluate the host response  
183 against them. Fibrotic capsules formed as early as 3 days post implantation (fig. S5). On  
184 day 7, the fibrotic capsules grew thicker. The aligned membranes had the smallest  
185 capsule thickness over the observation period (Fig. 2G). On day 14, FBGCs formed on  
186 the scaffolds. Bulk-tissue RNA-Seq in samples of Aligned and Saline group were  
187 performed. In comparison with Saline control, the Aligned group showed gene enrichment  
188 in inflammatory response, leukocyte chemotaxis and migration (Fig. 2I). KEGG analysis  
189 revealed elevated gene expression in immuno-related signaling pathways (Fig. 2J). In  
190 both rat and mouse models, the aligned membranes led to faster wound healing, reduced  
191 fibrotic response and enhanced regeneration of cutaneous appendages compared to  
192 membranes with other surface topography. Meanwhile, they induced up-regulated genes  
193 associated with immuno-related biological processes and signaling pathways. We then  
194 sought to explore the microenvironment around aligned membranes. Here, we used  
195 single-cell RNA-seq to sequence cells from the murine full-thickness skin samples 7 days  
196 post-wounding.

### 197 **Single-cell transcriptome analysis of full-thickness skin after wounding and** 198 **scaffold placement**

199 We isolated cells from the Aligned and Saline groups (n=4 biological replicates in each  
200 group), and applied them to the 10X scRNAseq platform. (Fig. 3A) A total of 8,982 cells in  
201 the Saline group and 9,593 cells in the Aligned group were captured (fig. S6). After cell  
202 filtering, 17,181 single cell transcriptomes were included in the final dataset (8,869 for the  
203 Aligned group and 8,312 for the Saline group). We first computationally pooled cells from  
204 Saline and Aligned groups to create a virtual aggregate. Potential batch effects were  
205 removed by scaling on each experimental condition. Unsupervised clustering using  
206 Seurat categorized the cells into 26 clusters based on global gene expression patterns (fig.  
207 S7), which were assigned to thirteen main classes of cells (Fig. 3B): keratinocytes (KER),  
208 fibroblasts (FIB), sebocytes (SEB), smooth muscle cells (SMC), endothelial cells (EC),

209 Schwann cells (SC), melanocytes (MEL), innate lymphoid cells (ILC),  
210 monocyte-macrophages (MAC), T cells (TC), neutrophils (NEU), dendritic cells (DC) and  
211 B cells (BC). Marker genes for each cell cluster were shown in the heatmap (Fig. 3C). The  
212 composition of each cell cluster was listed so that the proportion of cells from two groups  
213 could be identified across all cell clusters. (Fig. 3B) As smooth muscle cells (57% from the  
214 Aligned group and 43% from the Saline group) could hardly regenerate at 7 days  
215 post-wounding, we regarded a proportion within  $50\pm 7\%$  as equilibrium between two  
216 groups. According to cellular composition, there were more endothelial cells and  
217 fibroblasts in the Aligned group, whereas higher proportion of macrophages, neutrophils,  
218 and B cells were found in the Saline group. The differences in cell composition  
219 corresponded with differences in gene expression. As shown in the volcano plot (Fig. 3D),  
220 genes related to macrophages (Itgam, Cd68, Arg1, Mrc1) and neutrophils (Cd14 and Tnf)  
221 were significantly higher expressed by the Saline samples. Marker genes for endothelial  
222 cells (Pecam1) and fibroblasts (Col6a3) were up-regulated in the Aligned group.

### 223 **Subclustering of keratinocytes reveals a higher proportion of hair follicle progenitor** 224 **cells from the Aligned group**

225 To explore the cellular heterogeneity of keratinocytes and inter-group differences, we  
226 selected cells that were in the first-level clustering defined as keratinocyte, and subjected  
227 them to a second round (second level) of unsupervised clustering. (Fig. 4A) The epidermis  
228 has a stratified structure composed of several layers of keratinocytes, and terminal  
229 cornification is achieved by keratinocytes passing through basal layers, differentiated  
230 layers, and cornified layers. (21) In our study, the basal layer (IFE B) was characterized by  
231 high expression of Krt5, Krt14, Mt2 and Krt15. Suprabasal keratinocytes (IFE D1) close to  
232 basal cells expressed elevated mature markers (Krt10 and Krt1). IFE D2 expressed  
233 elevated Mt4, which marked a transition from mature state to terminally differentiated  
234 state. (23) IFE D3 expressed higher Lor, a gene for stratum corneum, and was regarded  
235 as the terminally differentiated layer. (Fig. 4A, B) The location of different keratinocyte  
236 subsets were marked in Fig. 4C. Hair follicles in this study were in second telogen since  
237 the mice were 8 to 10 weeks old when they were sacrificed. (24) However, we also found  
238 anagen hair follicle gene signatures when analyzing the data, which might result from hair



239 follicle regeneration after skin excisional wound. Upper hair follicle cells were separated  
240 into three subsets. uHF 1 had a typical hair follicle gene signature (Krt79<sup>hi</sup>, Krt17<sup>hi</sup>). uHF 2  
241 expressed a unique marker Klk10, and were located to suprabasal rings of cells around  
242 sebaceous gland opening (23) (Fig. 4C). The upper hair follicle basal layer (uHF B)  
243 expressed high Sostdc1, Apoe, Ccl27a and Ifitm3, and basal cell signatures (Krt5, Krt14).  
244 The hair follicle progenitor cells (HF P) were featured by high expression of Krt28, Lhx2,  
245 Mki67 and Stmn1, which indicated active cellular proliferation in this population. The  
246 germinative layer cells (Mt2<sup>hi</sup>Dcn<sup>hi</sup>) belonging to anagen hair follicles expressed high cell  
247 proliferation related genes like Top2a, Mki67 and Birc5. Meanwhile, they had a basal cell  
248 gene signature (Krt5<sup>hi</sup>Krt14<sup>hi</sup>). The inner root sheath (IRS) and cortex cells were  
249 characterized by Krt28, Krt27, Krt73, and Krt25, markers for the Henle and Huxley layers  
250 of anagen hair follicles. (25) Cells of the inner bulge layer (IB) and outer bulge layer (OB)  
251 expressed their typical gene signatures (Fig. 4A-C). When comparing the inter-group  
252 differences, the Aligned group contributed to a larger proportion of hair follicle progenitor  
253 cells (HF P) and highly proliferative inner root sheath cells (IRS) (Fig. 4A). The overall  
254 difference analysis also revealed up-regulation of genes (Krt28, Sox18) related to hair  
255 follicle stem cells in the Aligned group. (Fig. 3D) This might explain the enhanced hair  
256 follicle regeneration observed in Aligned groups either on rat or mouse models.

257 **Inter-group differences in fibroblasts suggest more active ECM formation in**  
258 **Aligned group**

259 The dermis consists of several layers: the papillary dermis lies closest to the epidermis,  
260 the underlying reticular dermis is thicker and contains the bulk of the fibrillar extracellular  
261 matrix, and beneath the reticular dermis lies the hypodermis. (26) Fibroblasts from  
262 different layers presented distinct gene signatures. In this study, the fibroblast populations  
263 were subjected to a second round of clustering, and 8 subsets were identified (Fig. 4D).  
264 There were four populations of papillary fibroblasts. They showed elevated expression of  
265 Crabp1 and Col23a1, markers for fibroblasts localized to papillary dermis (27, 28). Other  
266 dermal fibroblasts expressed increased Ccl11 and Dcn. The Gpx3<sup>+</sup>Plac8<sup>hi</sup> subset was  
267 identified as hypodermis fibroblast located to the adventitia (HDF1), and the Gpx3<sup>+</sup>Plac8<sup>lo</sup>  
268 subset (HDF2) was around the panniculus carnosus muscle. (25) Contractile

269 myofibroblasts were featured by increased Acta2. Meanwhile, this subset of  
270 myofibroblasts expressed high level of genes associated with cell proliferation (Birc5<sup>hi</sup>).  
271 Composition of each subset revealed that more papillary fibroblasts (PF2), dermal  
272 fibroblasts (DF), hypodermis fibroblasts (HDF2) and myofibroblasts (MF) were from the  
273 Aligned group, suggesting more robust tissue formation in the presence of scaffolds (Fig.  
274 4D).

#### 275 **Neutrophils are more abundant in the Saline samples**

276 By sub-clustering the neutrophil population, three subsets were identified. (Fig. 4E)  
277 Peripheral blood neutrophils (PBN) expressed typical gene signatures including Csf3r,  
278 Pglyrp1, Il1b, and Retnlg. After wounding, neutrophils close to the focus of injury migrate  
279 toward the nidus, followed by a second 'swarm' of neutrophils recruited from more than  
280 200µm from the site of tissue injury. (29) In this work, activated neutrophils were  
281 separated into two subsets. Neutrophil 2 (Neu2) expressed elevated Cd14, the principal  
282 receptor mediating lipopolysaccharides (LPS) responses (30), and Ccl3, a leukocyte  
283 chemoattractant (31). Therefore Neu2 were empirically defined as antimicrobial  
284 phagocytic neutrophils. Besides Cd14 and neutrophil-derived chemokines, Neutrophil 1  
285 (Neu1) expressed elevated Ccr1, a chemokine receptor that mediates neutrophil  
286 migration, and keratinocyte gene signatures (Krt14), which suggested possible  
287 communication between Neu1 and resident keratinocytes. (32, 33) Correspondingly, PBN  
288 showed gene enrichment in leukocyte chemotaxis and migration; Neu1 expressed genes  
289 enriched in leukocyte/granulocyte chemotaxis and migration. Neu2 was enriched in  
290 anti-bacterial biological processes (GO analysis). (Fig. 4F) According to the correlation  
291 analysis, Neu 1 and Neu 2 were functional neutrophils derived from PBN in circulation (Fig.  
292 4G). In PBN subset, the number of cells from the Aligned and Saline group was  
293 comparable. However, in Neu1 and Neu2, cells from the Saline group took up a much  
294 larger proportion (Fig. 4E). The differences suggested that neutrophil infiltration was more  
295 significant in the Saline samples at a proliferative stage (7 days post-wounding).

#### 296 **Dendritic cells in the scaffold immune microenvironment**

297 Dendritic cells were classified into two subpopulations (Fig. 4H). The subset derived from  
298 monocytes (DC) was characterized by increased Cd207 (Langerin, expressed by

299 Langerhans cells and some dendritic cell subsets), *Csf2rb*, and *Cd86* (ligand for T cell  
300 costimulatory receptor) (15, 34). Besides *Cd207*, the Langerhans cell subset bore a  
301 keratinocyte gene signature (elevated *Lgals7*, *Krt5*, *Krt14*), which was probably  
302 transferred from the resident microenvironment (33) (Fig. 4I). Both DC and LC presented  
303 elevated major histocompatibility complex (MHC) molecules, suggesting an antigen  
304 presenting function of them (Fig. 4J). When comparing inter-group differences, DC was  
305 composed of equal number of cells from saline and aligned samples, whereas LCs  
306 contained more saline-derived cells, indicating differences in Langerhans cell infiltration  
307 between groups.

### 308 **Macrophage heterogeneity and their down-regulation by scaffolds**

309 To explore the heterogeneity of macrophages in vivo and their inter-group differences, we  
310 subjected them to further unsupervised sub-clustering. Four subsets were determined  
311 (Fig. 5A). Among them, one subpopulation showed increased expression of genes  
312 associated with anti-inflammatory macrophages, such as *Ccl8*, *Folr2*, *C1qa* and *Mrc1*, and  
313 was named anti-inflammatory macrophages (AIM). (35, 36) Another subset characterized  
314 by elevated expression of pro-inflammatory genes (*Ptgs2*, *Ccl3*, *Inhba*, *Nos2*) was named  
315 pro-inflammatory macrophages (PIM) (37, 38). The monocyte subset (Mono) was  
316 characterized by increased expression of genes like *Ly6c2* and *Plac8* (Fig. 5B).  
317 Meanwhile, the higher expression of *Cd14*, *Clec4e*, and *Il1b* in this subset indicted  
318 inflammatory responses against lesions and microorganism (30, 39). The subset of cells  
319 extending towards the dendritic cell population was defined as monocyte-derived dendritic  
320 cells (M-DC), characterized by *Cd74*, *Cytip*, *H2-Eb1*, and *Ccr7* (40). We further found that  
321 canonical M1 and M2 markers were not entirely consistent with computationally  
322 determined pro- and anti- inflammatory macrophage subsets. *Arg1*, a canonical M2  
323 marker, was expressed by basically all monocyte-macrophage subsets (AIM, PIM, Mono),  
324 and was therefore regarded as a pan-macrophage marker in this study (Fig. 5B).  
325 Expression of another type 2 gene, *Socs3*, did not parallel *Mrc1* expression either. Similar  
326 pattern of disparity was found in the expression of canonical type 1 genes. M-DC, rather  
327 than PIM, expressed more *Cd86*. The expression of *Cd86* did not correlate with another  
328 type 1 gene *Nfkbiz*. Expression patterns of other genes associated with fibrotic or

329 regenerative macrophage subsets (proposed by Sommerfeld et al.) in a scaffold immune  
330 microenvironment did not correspond with the unbiased clusters either (Fig. 5B).  
331 According to the distribution of surface markers, we determined that Ly6c2, Arg1, Mrc1  
332 and Nos2 were sufficient to distinguish the computationally determined AIM, PIM and  
333 Mono subsets. To validate these markers experimentally, we performed flow cytometry on  
334 cells isolated from the Aligned and Saline treatment conditions using Cd68 (a  
335 monocyte-macrophage marker, also expressed by some neutrophils and dendritic cells)  
336 and the proposed markers (Ly6c2, Arg1, Mrc1 and Nos2). The Cd68<sup>+</sup> cells were selected  
337 to create a t-distributed stochastic neighbor embedding (tSNE) plot. We then identified  
338 Arg1<sup>+</sup> macrophages expressing the surface markers Mrc1 and Nos2 in the gated dataset  
339 to represent AIM and PIM, respectively. The Arg1<sup>-</sup>Ly6c2<sup>+</sup> monocytes were also identified  
340 (Mono). The three terminal clusters (AIM, PIM, and Mono) could be separated in the plot,  
341 which suggested that the subsets can be identified experimentally using flow cytometry  
342 (Fig. 5C). Correlation analysis of the four subsets revealed that monocytes developed into  
343 M-DCs and functional macrophages (AIM and PIM). Although AIM and PIM expressed  
344 opposite gene signatures, they were highly correlated (Fig. 5D). The Saline samples  
345 contributed to a larger proportion of cells in all subsets (Fig. 5A). Therefore, the  
346 immunomodulatory effects that aligned membranes had on the microenvironment might  
347 involve reduction in macrophage infiltration at the proliferative stage (7 days  
348 post-wounding).

#### 349 **Subclustering of T cells revealed a novel T cell population and more effector T cells** 350 **in the Aligned group**

351 T cell population was subjected to further unsupervised sub-clustering to identify the T cell  
352 phenotypes and inter-group differences. T cells were classified into four subsets (Fig. 5E).  
353 T cells characterized by increased expression of Cd7, Cd3g, and Areg were defined as  
354 Early T cells (ET). (41) The subset adjacent to ET expressed elevated Xcl1, a  
355 chemoattractant for XCR1 expressed on dendritic cells, and Sult2b1, an  
356 oxysterol-metabolizing enzyme rapidly induced in response to T cell activation, and was  
357 named Activated T cell 1 (AT1) (42). AT1 also expressed increased Areg, Ctla2a, and  
358 Ctla2b, factors well-characterized for their role in immune homeostasis and

359 immunosuppression (43, 44). Another activated T cell subset (AT2) expressed  
360 up-regulated genes associated with cytotoxic T cells (Cd8b1), Th1 cells (Ifng, Ptpn18),  
361 and Th17 cells (Il17a, Il17f). (45, 46) Moreover, AT2 expressed higher Il22, a signature  
362 cytokine for type 3 immune response after skin injury. (46) Therefore, AT2 might be an  
363 aggregate of multiple effector T cells. A novel T cell subset connecting AT2 and ET was  
364 featured by high expression of Birc5, Mki67 and Stmn1, markers for cell proliferation, and  
365 was named Proliferating T cell (PT) (Fig. 5E, F). To characterize potential functional  
366 properties of these T cell subsets, we compared outcomes of their gene enrichment  
367 analysis. In GO analysis, both ET and AT1 were enriched in T cell activation. AT1 was also  
368 found elevation of T cell receptor signaling pathway, suggesting that these T cells played a  
369 role in antigen recognition. AT2 was enriched in T cell activation, adaptive immune  
370 response, and regulation of leukocyte activation, indicating regulatory effects of these  
371 effector T cells on both adaptive and innate immune cells. PT expressed gene sets  
372 associated with regulation of cell cycle process, suggesting that these T cells were highly  
373 proliferative (Fig. 5F). We used pseudo-time analysis (Monocle 2) to elucidate  
374 relationships between the T cell subsets and found three terminally differentiated clusters  
375 stemming from two precursors (ET and AT1). PT was differentiated from AT1 and ET after  
376 the first branch point. After the second branch, cells differentiated into two terminal  
377 clusters. One belonged to AT1 and ET, and another one was the AT2 population (Fig. 5G).  
378 Correlation analysis showed that ET and AT1 were highly correlated, which developed  
379 into PT and terminally differentiated AT2 cells (Fig. 5H). In the ET and AT1 population,  
380 more cells were from saline samples, whereas a larger number of cells in AT2 (effector T  
381 cells) and PT (proliferating T cells) were from aligned samples. As AT2 was enriched in  
382 adaptive immune response, the immune response in aligned samples might have  
383 advanced towards the adaptive immune stage (15). The newly found PT population might  
384 be a transitional status between early T cells and effector T cells.

## 385 **Discussion**

386 For this study, we fabricated electro-spun membranes with three types of surface  
387 topography (Random, Aligned, and Latticed). The aligned membranes led to faster wound  
388 healing, reduced fibrotic response and enhanced regeneration of cutaneous appendages

389 compared to other scaffolds. Meanwhile, the aligned membranes exhibited  
390 immunomodulatory properties. (Fig. 6A) Based on that, we generated single-cell  
391 transcriptomes from wounded mouse skin in the presence/absence of the material to  
392 investigate the microenvironment around scaffolds, including cell types together with their  
393 respective gene expression programs, cell heterogeneity, and as the interplay between  
394 immune cells and tissue cells. Overall, we identified 45 cell populations, and summarized  
395 the following highlights. The time course of immune response might be advanced by  
396 aligned scaffolds. The skin wound repair process was classically divided into four phases:  
397 hemostasis (hours), inflammation (days), proliferation (1-2 weeks), and remodeling (>2  
398 weeks). 7 days post-wounding was a transitional time point between the inflammatory  
399 stage and repair phase, and when the innate immune response subsided and activity of  
400 adaptive immune cells increased. (15) In the saline samples, the infiltration of T cells  
401 achieved a similar extent with macrophages, and the number of neutrophils was about  
402 half of that (Fig. 6B Overall distribution). However, in Aligned group, infiltrated  
403 macrophages were much fewer than T cells, approaching the number of neutrophils (7  
404 days after skin wound). Moreover, in T cell composition, although the overall number of T  
405 cells in Saline samples was comparable with Aligned samples, more terminally  
406 differentiated effector T cells came from aligned ones, indicating that there were more  
407 functional T cells in the aligned samples (Fig. 6B). According to the timeframe of innate  
408 and adaptive immune responses (15), the process of innate immunity seemed to be  
409 alleviated earlier, and adaptive immune response was advanced in the presence of  
410 aligned scaffolds (Fig. 6C). As shown in Fig. 6D, in the microenvironment around aligned  
411 scaffolds, damage-associated molecular patterns (DAMPs), pathogen-associated  
412 molecular patterns (PAMPs) and antigens from cell debris, pathogens, and foreign agents  
413 (scaffold) triggered innate and adaptive immune responses. Neutrophils from circulation  
414 ( $Csf3^{hi}Il1b^{+}Retnlg^{hi}$  PBN cells) quickly migrated to the wound area. The infiltrated  
415 neutrophils ( $Cd14^{hi}Lilrb4a^{hi}$  Neu2) phagocytosed dying cells and microorganisms, and  
416 secreted chemo-attractants ( $Ccr1^{hi}Ccl4^{hi}Cxcl3^{hi}$  Neu1) like Ccr1 and Ccl4 to recruit more  
417 leukocytes and lymphoid cells. (47) Circulating monocytes ( $Ly6c2^{+}Cd14^{hi}Plac8^{hi}$  Mono)  
418 were also recruited to the wound area, and differentiated into pro-inflammatory

419 macrophages (Ptgs2<sup>hi</sup>Inhba<sup>hi</sup>Nos2<sup>+</sup> PIM), which endocytosed dying neutrophils and debris.  
420 Meanwhile, there were comparable amount of anti-inflammatory macrophages  
421 (Folr2<sup>hi</sup>Mrc1<sup>hi</sup>Ccl8<sup>+</sup> AIM) responsible for chemo-attracting more immune cells. Part of  
422 monocytes differentiated into dendritic cells (Cd74<sup>hi</sup>Cytip<sup>hi</sup>H2-Eb1<sup>hi</sup> M-DC). Tissue  
423 resident Langerhans cells (Cd207<sup>+</sup>Krt14<sup>hi</sup> LC), together with monocyte-derived dendritic  
424 cells (Cd207<sup>hi</sup>Cd86<sup>hi</sup>Csf2rb<sup>hi</sup> DC), functioned as antigen-presenting cells (APCs). In the  
425 antigen specific signal (Signal 1), LC and DC sensed antigens through pattern recognition  
426 receptors (PRR), and processed them into peptides, which were then presented by the  
427 MHC class II molecules (elevated H2-Aa, H2-Eb1 expression by DC and LC) on the cell  
428 surface. After priming by APCs, T cells (Cd7<sup>hi</sup>Areg<sup>hi</sup>Ctla2b<sup>hi</sup> ET and Sult2b1<sup>hi</sup>Xcl1<sup>hi</sup>Ctla2a<sup>hi</sup>  
429 AT1) bound to the MHC molecules through surface receptors (TCR), and differentiated  
430 into effector T cells (Cd4<sup>+</sup> AT2 cells). The co-stimulatory signal (Signal 2) was also  
431 activated, characterized by the engagement of Cd28 receptor on T cells (AT2,  
432 Cd8b1<sup>+</sup>Cd28<sup>hi</sup>) with Cd86 ligands on APCs (Cd86<sup>+</sup> DC and LC). (15, 48) Major types of  
433 cytokines produced by the effector T cells (AT2) were associated with type 3 (Il22, Il17)  
434 and type 1 (Ifng) immunity, whereas ET and AT1 expressed elevated Areg (type 2  
435 immunity effector cytokine). The regenerative outcome was comprehensively affected by  
436 these signals.

#### 437 **Conflict of interest**

438 There are no conflicts of interest related to this manuscript.

#### 439 **Author contribution**

440 Chen Hu<sup>#</sup>: Participate in drafting the article, substantial contributions to conception,  
441 design, acquisition, analysis and interpretation of data.

442 Chenyu Chu<sup>#</sup>: Participate in drafting the article, substantial contributions to conception,  
443 design, acquisition, analysis and interpretation of scRNA-seq and related data.

444 Li Liu: Substantial contributions to conception, design and analysis of data.

445 Yili Qu<sup>\*</sup>: Participate in correspondence, critical revision, analysis and interpretation of data.

446 Email:qqyili@126.com

447 Yi Man<sup>\*</sup>: Participate in correspondence, critical revision, analysis and interpretation of  
448 data.Email:manyi780203@126.com

449 # these authors contribute equally to this work

450 \* Correspondence to associate professor Yili Qu (Email:qqyili@126.com) and professor

451 and chair Yi Man (manyi780203@126.com)

452 **Acknowledgement**

453 Special appreciation and thanks are extended to Shue Jin, Chenbin Wang, Renli Yang

454 and Shengan Rung's assistance for process of material design and fabrication, animal

455 experiment, In vitro experiment and design and illustration of the graph.

456



**Fig. 1**

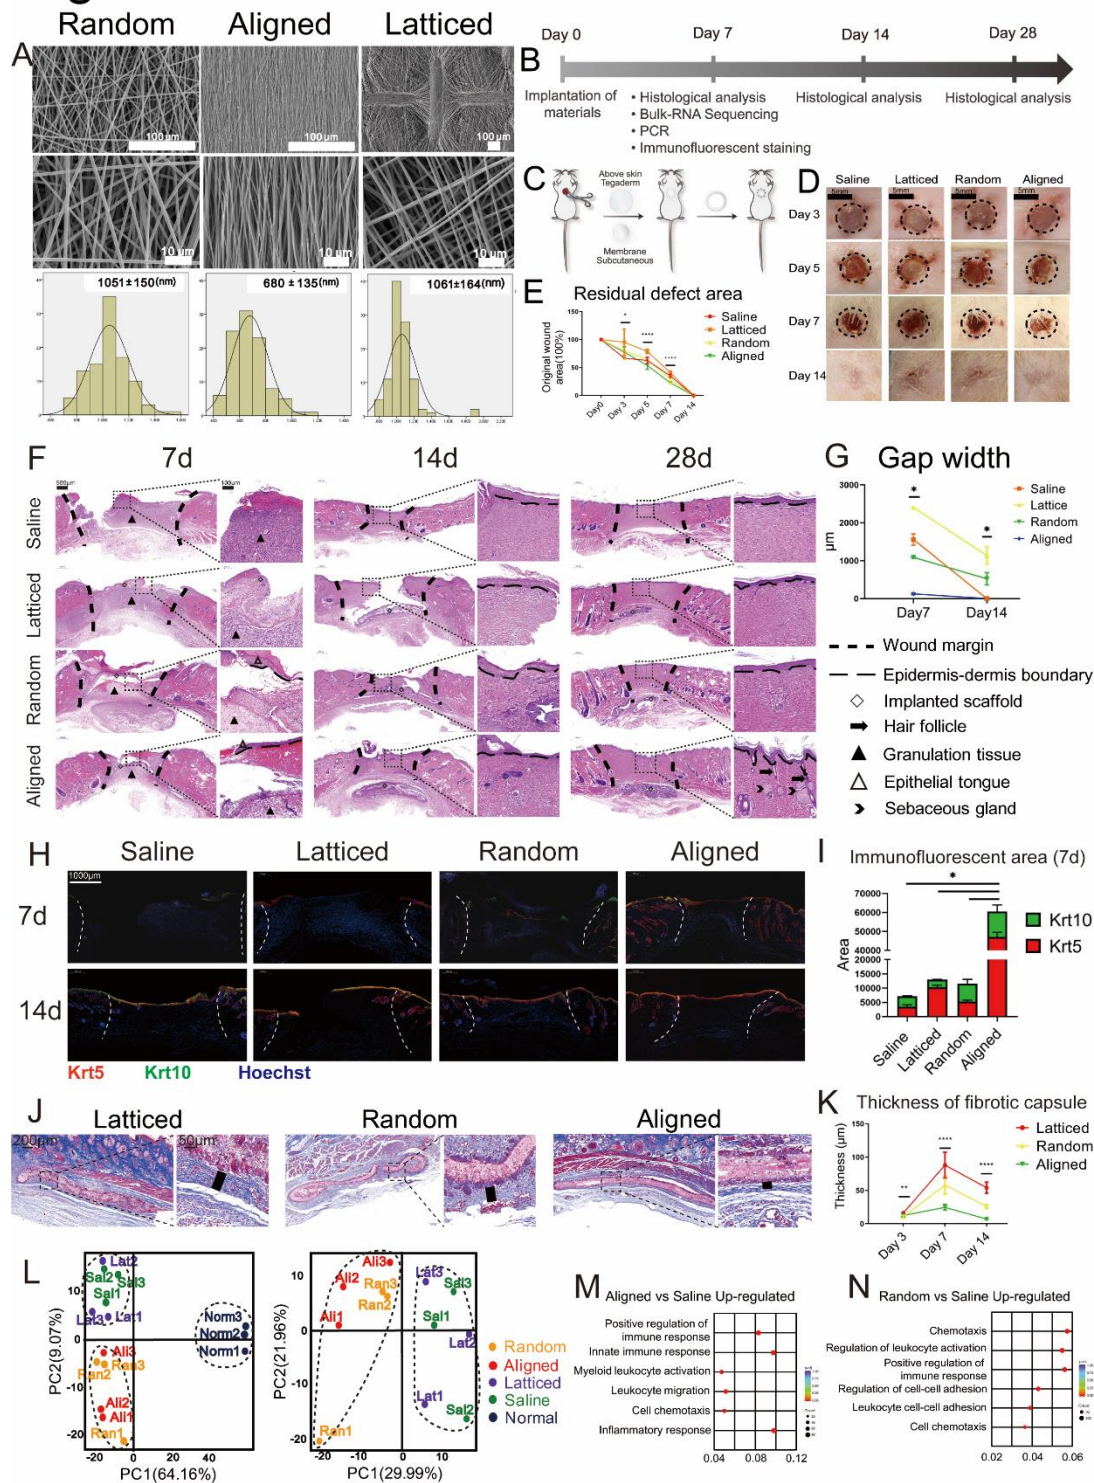

457

458

**Figure legends:**

459 Fig. 1 Evaluation of rat skin wound healing implanted with three types of electrospun  
 460 scaffolds at 7 days post-wounding. (A) Surface topography of three types of electrospun  
 461 membranes. (B) Workflow for evaluating rat skin wound healing. (C) Surgical process for  
 462 the rat cutaneous excisional wound model. (D, E) The aligned scaffolds accelerated

463 closure of wound. (F, G) Histological analysis of saline control and groups implanted with  
464 three types of scaffolds and semi-quantitative evaluation of gap width. (H, I)  
465 Immunofluorescent staining using Krt5 (red) and Krt10 (green) and semi-quantitative  
466 evaluation of the fluorescent area. (J, K) Evaluation of fibrotic capsules formed around  
467 biomaterials. (L-N) PCA and GO analysis revealed immunomodulatory effects for aligned  
468 and random scaffolds.  
469

Fig. 2

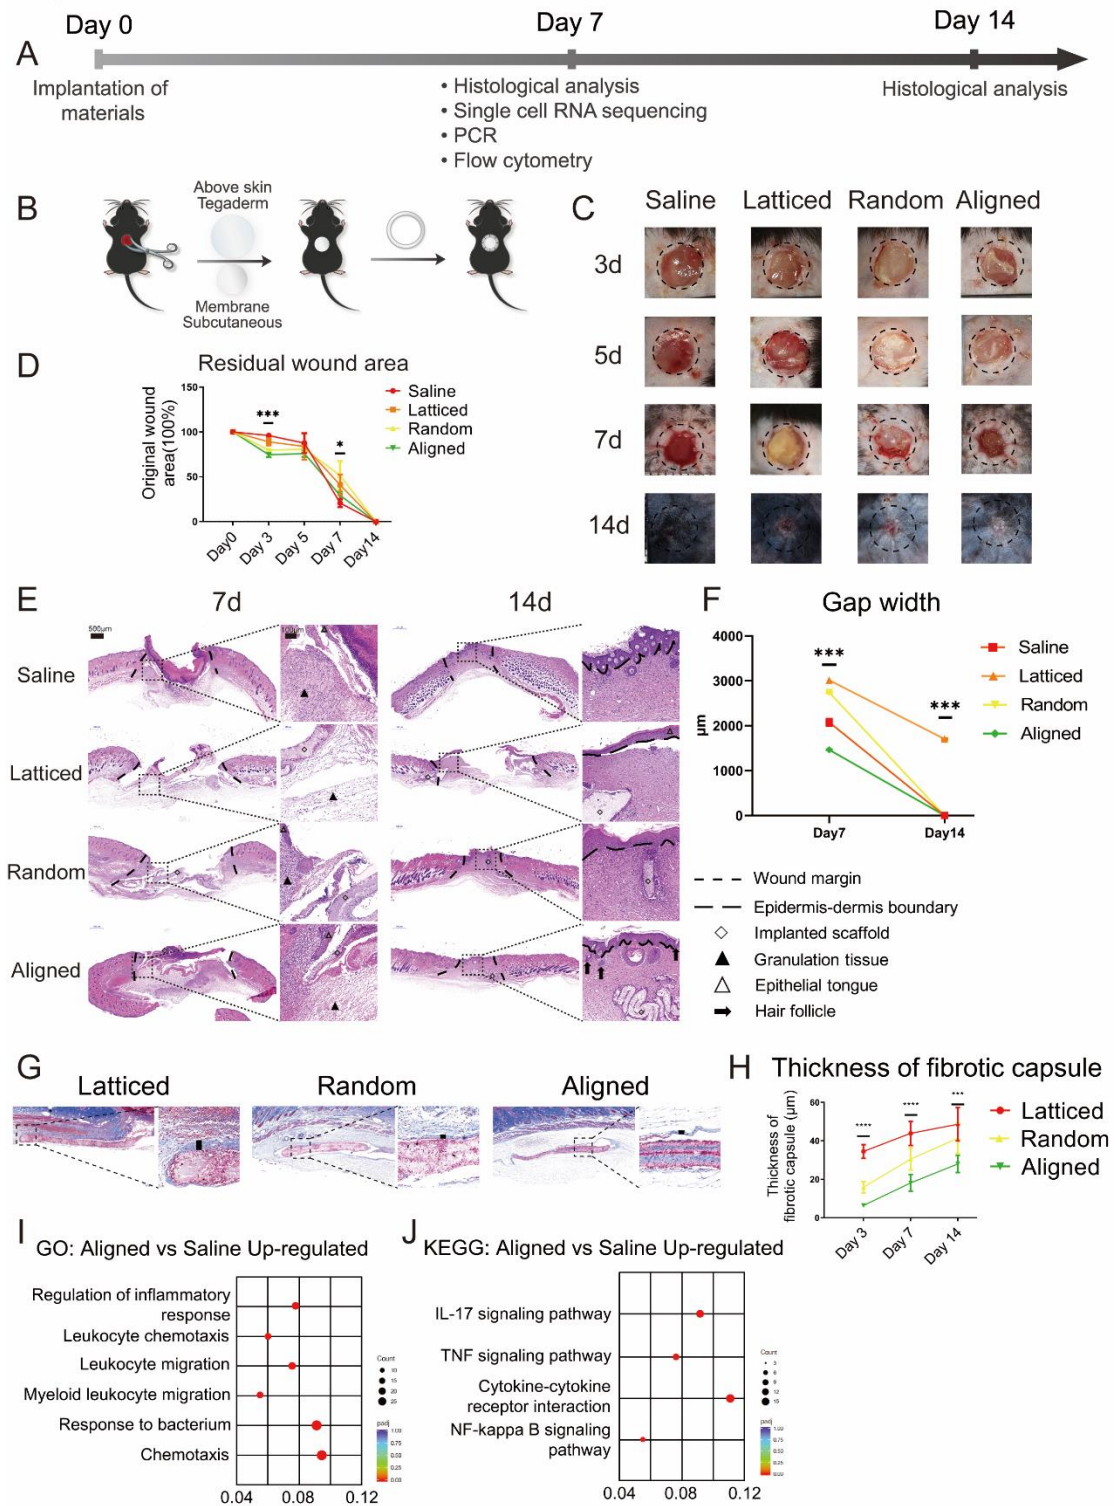

470

471 Fig. 2 Evaluation of mouse skin wound healing implanted with three types of electrospun  
 472 scaffolds at 7 days post-wounding. (A) Workflow for evaluating mouse skin wound healing.  
 473 (B) Surgical process for the mouse cutaneous excisional wound model. (C, D) The aligned  
 474 scaffolds accelerated wound closure compared with other scaffolds, and were similar with

475 Saline group. (E, F) Histological analysis of saline control and groups implanted with three  
476 types of scaffolds and semi-quantitative evaluation of gap width. (G, H) Evaluation of  
477 fibrotic capsules formed around biomaterials. (I, J) GO and KEGG analysis revealed  
478 immunomodulatory effects for aligned scaffolds.  
479

Fig. 3

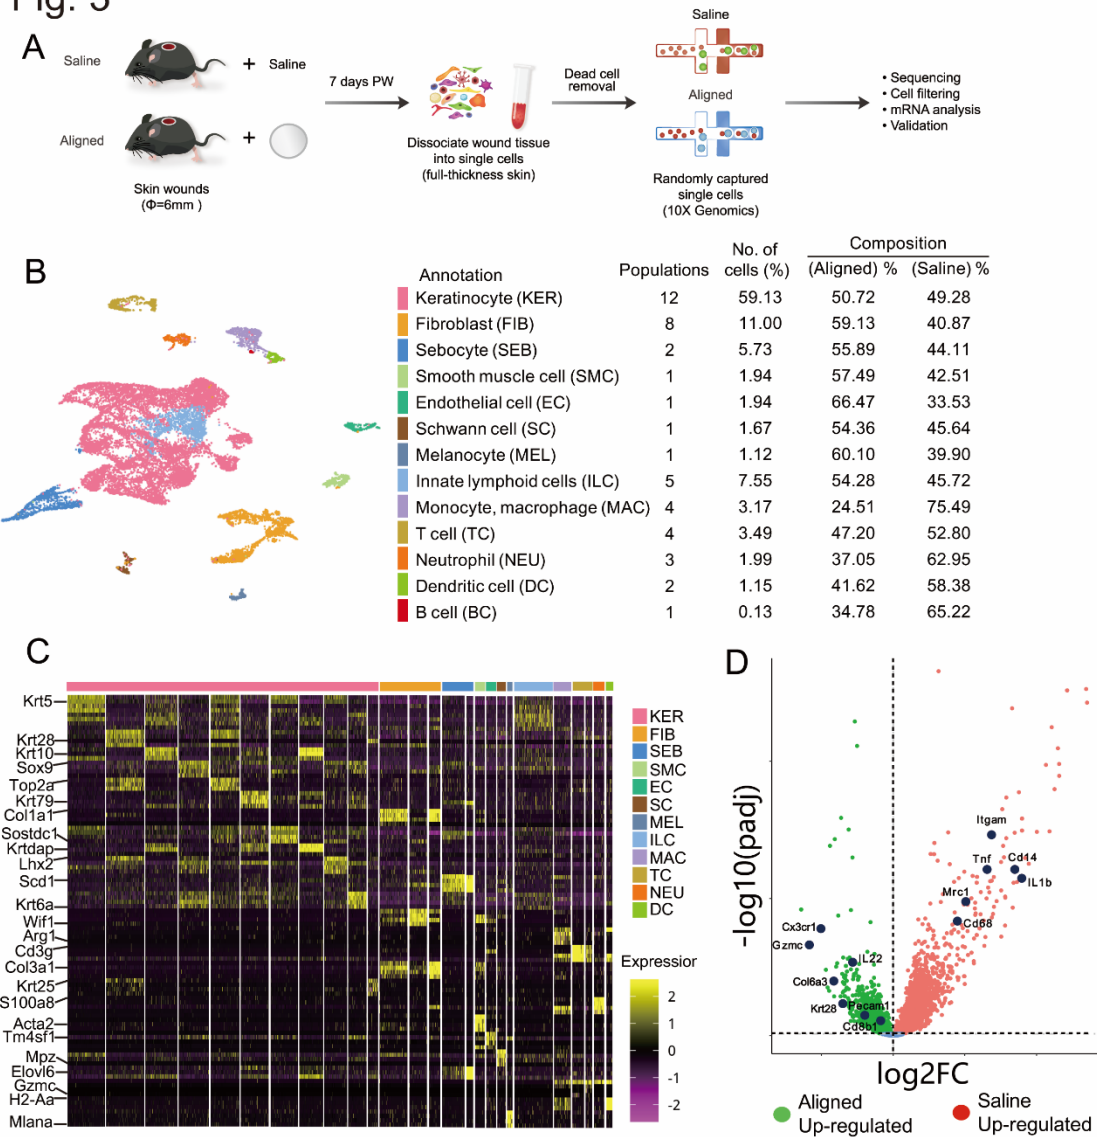

480

481 Fig. 3 Overview of the single-cell transcriptome analysis. (A) Single-cell experiment  
 482 workflow. (B) Cells were categorized into thirteen main classes. The number of cell  
 483 populations in each cell class, no. of cells (%), and composition of aligned and saline  
 484 samples were listed. (C) Marker genes for different cell classes. (D) Gene expression  
 485 differences between saline and aligned samples.

486

Fig. 4

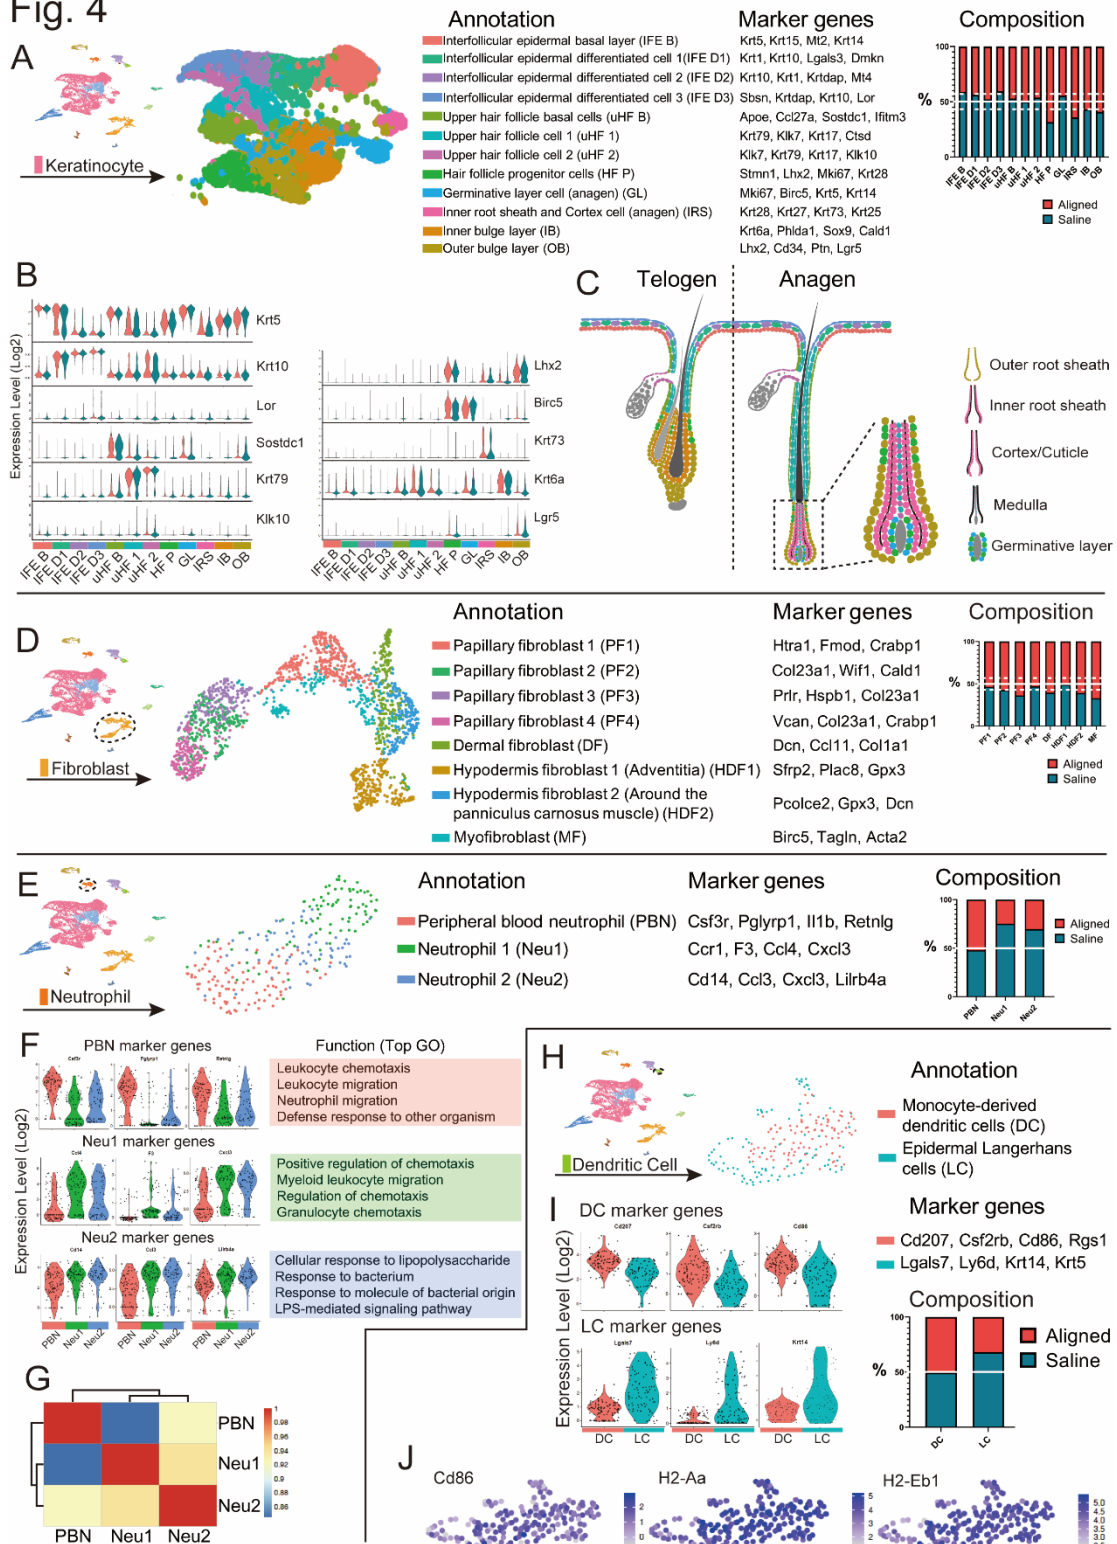

487

488 Fig. 4 Further analysis of keratinocytes, fibroblasts, neutrophils and dendritic cells. (A)

489 Subclustering of keratinocytes revealed twelve subsets. The Aligned group contributed to

490 a larger proportion of hair follicle progenitor cells (HF P) and highly proliferative inner root

491 sheath cells (IRS). (B) Marker genes for each keratinocyte subset. (C) Location of

492 different keratinocyte subsets. The coexistence of telogen and anagen hair follicle gene  
493 signatures suggested regeneration of hair follicles after skin wound. (D) Subclustering of  
494 fibroblasts revealed eight subsets. The marker genes and composition for each subset  
495 was listed. (E) Subclustering of neutrophils revealed three subsets. (F) Marker genes for  
496 neutrophil subsets and their enriched gene sets in GO analysis. (G) Correlation analysis  
497 of neutrophil subsets. (H) Subclustering of dendritic cells revealed two subsets. (I) Marker  
498 genes for dendritic cell subsets. (J) Expression of genes associated with antigen  
499 presenting in dendritic cells.

500

Fig. 5

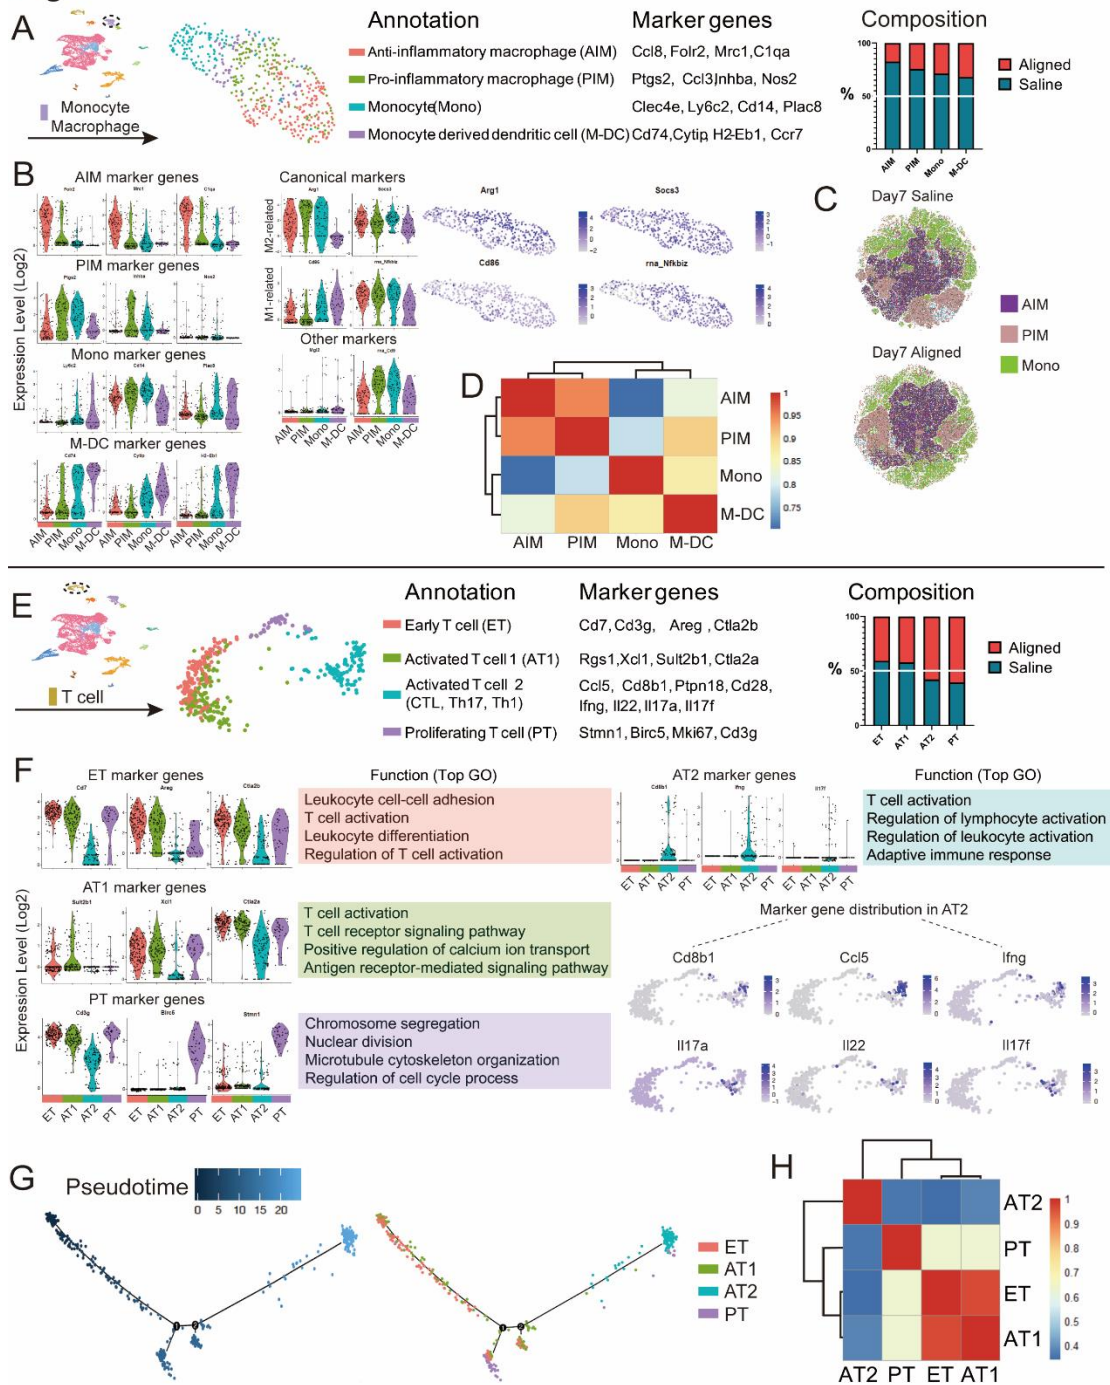

501

502 Fig. 5 Further analysis of macrophages and T cells. (A) Subclustering of macrophages  
 503 revealed four subsets. The saline samples provided more macrophages in every subset.  
 504 (B) Marker genes for each macrophage/monocyte subset. Expression of canonical M1  
 505 and M2 markers and other markers were shown. (C) In vivo flow cytometry strategy using  
 506 Cd68 to identify monocytes and macrophages. Arg1<sup>+</sup> macrophages expressing the  
 507 surface markers *Mrc1* and *Nos2* in the gated dataset represented AIM and PIM,



508 respectively. The Arg1<sup>+</sup>Ly6c2<sup>+</sup> monocytes were also identified (Mono). (D) Correlation  
509 analysis of macrophage/monocyte subsets. (E) Subclustering of T cells revealed four  
510 subsets. (F) Marker genes for T cell subsets and their enriched gene sets in GO analysis.  
511 AT2 cell subset expressed up-regulated genes associated with cytotoxic T cells, Th1 cells,  
512 and Th17 cells. (G) Pseudotemporal ordering of T cells, and the distribution of four  
513 subsets along the trajectory. (H) Correlation analysis of T cell subsets.  
514

Fig. 6

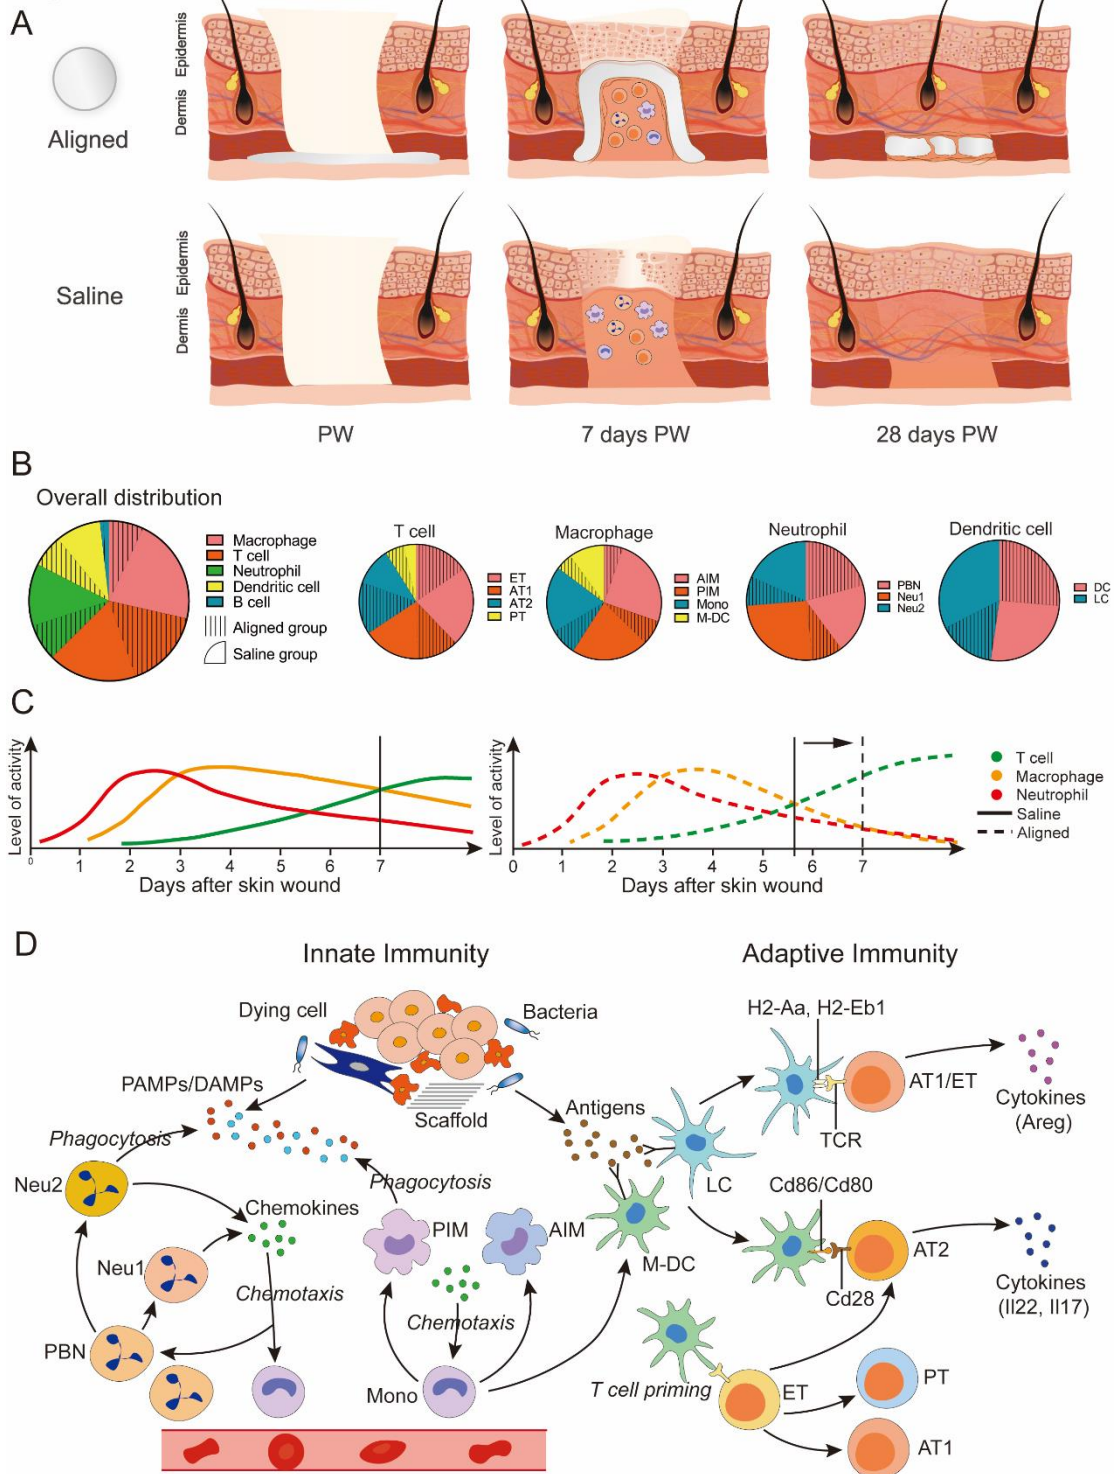

515

516 Fig. 6 Summary of the differences in wound healing and immune responses between the  
 517 Aligned group and Saline group. (A) The aligned membranes had immunomodulatory  
 518 properties, and led to faster wound healing, reduced fibrotic response and enhanced  
 519 regeneration of cutaneous appendages. (B) The differences in infiltrated immune cells  
 520 between aligned and saline samples. (C) Timeframe of innate and adaptive immune

521 responses might be advanced by aligned scaffolds. (D) The immune microenvironment  
522 around aligned scaffolds, and the interplay of diverse immune cells.  
523

524 **References**

- 525 1. Li X, Cho B, Martin R, Seu M, Zhang C, Zhou Z, et al. Nanofiber-hydrogel composite-mediated  
526 angiogenesis for soft tissue reconstruction. *Science translational medicine*. 2019;11(490).
- 527 2. Yang Z, He C, He J, Chu J, Liu H, Deng X. Curcumin-mediated bone marrow mesenchymal stem cell  
528 sheets create a favorable immune microenvironment for adult full-thickness cutaneous wound healing.  
529 *Stem cell research & therapy*. 2018;9(1):21.
- 530 3. Veisoh O, Doloff JC, Ma M, Vegas AJ, Tam HH, Bader AR, et al. Size- and shape-dependent foreign  
531 body immune response to materials implanted in rodents and non-human primates. *Nature materials*.  
532 2015;14(6):643-51.
- 533 4. Mandal A, Boopathy AV, Lam LKW, Moynihan KD, Welch ME, Bennett NR, et al. Cell and fluid  
534 sampling microneedle patches for monitoring skin-resident immunity. *Science translational medicine*.  
535 2018;10(467).
- 536 5. Rosen MR, Robinson RB, Brink PR, Cohen IS. The road to biological pacing. *Nature reviews*  
537 *Cardiology*. 2011;8(11):656-66.
- 538 6. Wang L, Li Y, Huang G, Zhang X, Pingguan-Murphy B, Gao B, et al. Hydrogel-based methods for  
539 engineering cellular microenvironment with spatiotemporal gradients. *Critical reviews in*  
540 *biotechnology*. 2016;36(3):553-65.
- 541 7. Doyle AD, Carvajal N, Jin A, Matsumoto K, Yamada KM. Local 3D matrix microenvironment  
542 regulates cell migration through spatiotemporal dynamics of contractility-dependent adhesions.  
543 *Nature communications*. 2015;6:8720.
- 544 8. Huang G, Li F, Zhao X, Ma Y, Li Y, Lin M, et al. Functional and Biomimetic Materials for Engineering  
545 of the Three-Dimensional Cell Microenvironment. *Chemical reviews*. 2017;117(20):12764-850.
- 546 9. Li H, Xu Y, Xu H, Chang J. Electrospun membranes: control of the structure and structure related  
547 applications in tissue regeneration and drug delivery. *Journal of materials chemistry B*.  
548 2014;2(34):5492-510.
- 549 10. Wang Y, Shi H, Qiao J, Tian Y, Wu M, Zhang W, et al. Electrospun tubular scaffold with  
550 circumferentially aligned nanofibers for regulating smooth muscle cell growth. *ACS applied materials*  
551 *& interfaces*. 2014;6(4):2958-62.
- 552 11. Martins A, Alves da Silva ML, Faria S, Marques AP, Reis RL, Neves NM. The influence of patterned  
553 nanofiber meshes on human mesenchymal stem cell osteogenesis. *Macromolecular bioscience*.

554 2011;11(7):978-87.

555 12. Kurpinski KT, Stephenson JT, Janairo RR, Lee H, Li S. The effect of fiber alignment and heparin  
556 coating on cell infiltration into nanofibrous PLLA scaffolds. *Biomaterials*. 2010;31(13):3536-42.

557 13. Chu C, Liu L, Rung S, Wang Y, Ma Y, Hu C, et al. Modulation of foreign body reaction and  
558 macrophage phenotypes concerning microenvironment. *Journal of biomedical materials research Part*  
559 *A*. 2020;108(1):127-35.

560 14. Sadtler K, Singh A, Wolf MT, Wang X, Pardoll DM, Elisseeff JH. Design, clinical translation and  
561 immunological response of biomaterials in regenerative medicine. *Nature Reviews Materials*.  
562 2016;1(7).

563 15. Dellacherie MO, Seo BR, Mooney DJ. Macroscale biomaterials strategies for local  
564 immunomodulation. *Nature Reviews Materials*. 2019;4(6):379-97.

565 16. Chung L, Maestas DR, Jr., Lebid A, Mageau A, Rosson GD, Wu X, et al. Interleukin 17 and  
566 senescent cells regulate the foreign body response to synthetic material implants in mice and humans.  
567 *Science translational medicine*. 2020;12(539).

568 17. Sommerfeld SD, Cherry C, Schwab RM, Chung L, Maestas DR, Laffont P, et al. Interleukin-36  
569 gamma-producing macrophages drive IL-17-mediated fibrosis. *Science immunology*. 2019;4(40).

570 18. Stuart T, Butler A, Hoffman P, Hafemeister C, Papalexi E, Mauck WM, 3rd, et al. Comprehensive  
571 Integration of Single-Cell Data. *Cell*. 2019;177(7):1888-902 e21.

572 19. Wu H, Han S, Wu B, Du X, Sheng Z, Lin J, et al. Single-cell mass cytometry reveals in vivo  
573 immunological response to surgical biomaterials. *Applied Materials Today*. 2019;16:169-78.

574 20. Perciani CT, MacParland SA. Lifting the veil on macrophage diversity in tissue regeneration and  
575 fibrosis. *Science immunology*. 2019;4(40).

576 21. Pastar I, Stojadinovic O, Yin NC, Ramirez H, Nusbaum AG, Sawaya A, et al. Epithelialization in  
577 Wound Healing: A Comprehensive Review. *Advances in wound care*. 2014;3(7):445-64.

578 22. Tokunaga R, Zhang W, Naseem M, Puccini A, Berger MD, Soni S, et al. CXCL9, CXCL10,  
579 CXCL11/CXCR3 axis for immune activation - A target for novel cancer therapy. *Cancer treatment*  
580 *reviews*. 2018;63:40-7.

581 23. Joost S, Zeisel A, Jacob T, Sun X, La Manno G, Lonnerberg P, et al. Single-Cell Transcriptomics  
582 Reveals that Differentiation and Spatial Signatures Shape Epidermal and Hair Follicle Heterogeneity.  
583 *Cell systems*. 2016;3(3):221-37 e9.

- 584 24. Myung P, Ito M. Dissecting the bulge in hair regeneration. *The Journal of clinical investigation*.  
585 2012;122(2):448-54.
- 586 25. Joost S, Annusver K, Jacob T, Sun X, Dalessandri T, Sivan U, et al. The Molecular Anatomy of  
587 Mouse Skin during Hair Growth and Rest. *Cell Stem Cell*. 2020;26(3):441-57.e7.
- 588 26. Philippeos C, Telerman SB, Oules B, Pisco AO, Shaw TJ, Elgueta R, et al. Spatial and Single-Cell  
589 Transcriptional Profiling Identifies Functionally Distinct Human Dermal Fibroblast Subpopulations. *The*  
590 *Journal of investigative dermatology*. 2018;138(4):811-25.
- 591 27. Tabib T, Morse C, Wang T, Chen W, Lafyatis R. SFRP2/DPP4 and FMO1/LSP1 Define Major  
592 Fibroblast Populations in Human Skin. *The Journal of investigative dermatology*. 2018;138(4):802-10.
- 593 28. Guerrero-Juarez CF, Dedhia PH, Jin S, Ruiz-Vega R, Ma D, Liu Y, et al. Single-cell analysis reveals  
594 fibroblast heterogeneity and myeloid-derived adipocyte progenitors in murine skin wounds. *Nature*  
595 *communications*. 2019;10(1):650.
- 596 29. Nauseef WM, Borregaard N. Neutrophils at work. *Nature immunology*. 2014;15(7):602-11.
- 597 30. Soler-Rodriguez AM, Zhang H, Lichenstein HS, Qureshi N, Niesel DW, Crowe SE, et al. Neutrophil  
598 activation by bacterial lipoprotein versus lipopolysaccharide: differential requirements for serum and  
599 CD14. *Journal of immunology*. 2000;164(5):2674-83.
- 600 31. Tecchio C, Cassatella MA. Neutrophil-derived chemokines on the road to immunity. *Seminars in*  
601 *immunology*. 2016;28(2):119-28.
- 602 32. Reichel CA, Khandoga A, Anders HJ, Schlondorff D, Luckow B, Krombach F. Chemokine receptors  
603 Ccr1, Ccr2, and Ccr5 mediate neutrophil migration to postischemic tissue. *Journal of leukocyte biology*.  
604 2006;79(1):114-22.
- 605 33. Su Q, Igyarto BZ. Keratinocytes Share Gene Expression Fingerprint with Epidermal Langerhans  
606 Cells via mRNA Transfer. *The Journal of investigative dermatology*. 2019;139(11):2313-23 e8.
- 607 34. Takahara K, Omatsu Y, Yashima Y, Maeda Y, Tanaka S, Iyoda T, et al. Identification and expression  
608 of mouse Langerin (CD207) in dendritic cells. *International immunology*. 2002;14(5):433-44.
- 609 35. Bohlson SS, O'Conner SD, Hulsebus HJ, Ho MM, Fraser DA. Complement, c1q, and c1q-related  
610 molecules regulate macrophage polarization. *Frontiers in immunology*. 2014;5:402.
- 611 36. Islam SA, Chang DS, Colvin RA, Byrne MH, McCully ML, Moser B, et al. Mouse CCL8, a CCR8  
612 agonist, promotes atopic dermatitis by recruiting IL-5+ T(H)2 cells. *Nature immunology*.  
613 2011;12(2):167-77.

- 614 37. Carrion M, Perez-Garcia S, Martinez C, Juarranz Y, Estrada-Capetillo L, Puig-Kroger A, et al. VIP  
615 impairs acquisition of the macrophage proinflammatory polarization profile. *Journal of leukocyte*  
616 *biology*. 2016;100(6):1385-93.
- 617 38. Kanter JE, Kramer F, Barnhart S, Averill MM, Vivekanandan-Giri A, Vickery T, et al. Diabetes  
618 promotes an inflammatory macrophage phenotype and atherosclerosis through acyl-CoA synthetase 1.  
619 *Proceedings of the National Academy of Sciences of the United States of America*.  
620 2012;109(12):E715-24.
- 621 39. Clement M, Basatemur G, Masters L, Baker L, Bruneval P, Iwawaki T, et al. Necrotic Cell Sensor  
622 Clec4e Promotes a Proatherogenic Macrophage Phenotype Through Activation of the Unfolded  
623 Protein Response. *Circulation*. 2016;134(14):1039-51.
- 624 40. Grosche L, Drassner C, Muhl-Zurbes P, Kamm L, Le-Trilling VTK, Trilling M, et al. Human  
625 Cytomegalovirus-Induced Degradation of CYTIP Modulates Dendritic Cell Adhesion and Migration.  
626 *Frontiers in immunology*. 2017;8:461.
- 627 41. Gerby B, Clappier E, Armstrong F, Deswarte C, Calvo J, Poglio S, et al. Expression of CD34 and CD7  
628 on human T-cell acute lymphoblastic leukemia discriminates functionally heterogeneous cell  
629 populations. *Leukemia*. 2011;25(8):1249-58.
- 630 42. Bensinger SJ, Bradley MN, Joseph SB, Zelcer N, Janssen EM, Hausner MA, et al. LXR signaling  
631 couples sterol metabolism to proliferation in the acquired immune response. *Cell*.  
632 2008;134(1):97-111.
- 633 43. Zaiss DMW, Gause WC, Osborne LC, Artis D. Emerging functions of amphiregulin in orchestrating  
634 immunity, inflammation, and tissue repair. *Immunity*. 2015;42(2):216-26.
- 635 44. Mahata B, Zhang X, Kolodziejczyk AA, Proserpio V, Haim-Vilmovsky L, Taylor AE, et al. Single-cell  
636 RNA sequencing reveals T helper cells synthesizing steroids de novo to contribute to immune  
637 homeostasis. *Cell reports*. 2014;7(4):1130-42.
- 638 45. Castro-Sanchez P, Ramirez-Munoz R, Roda-Navarro P. Gene Expression Profiles of Human  
639 Phosphotyrosine Phosphatases Consequent to Th1 Polarisation and Effector Function. *Journal of*  
640 *immunology research*. 2017;2017:8701042.
- 641 46. Boothby IC, Cohen JN, Rosenblum MD. Regulatory T cells in skin injury: At the crossroads of  
642 tolerance and tissue repair. *Science immunology*. 2020;5(47).
- 643 47. Bromley SK, Mempel TR, Luster AD. Orchestrating the orchestrators: chemokines in control of T

644 cell traffic. *Nature immunology*. 2008;9(9):970-80.

645 48. Kapsenberg ML. Dendritic-cell control of pathogen-driven T-cell polarization. *Nature reviews*

646 *Immunology*. 2003;3(12):984-93.

647



648 **Materials and methods of “Dissecting the microenvironment**  
649 **around biosynthetic scaffolds in murine skin wound healing”**

650 Chen Hu DDS, Ph.D<sup>a,b,#</sup>, Chenyu Chu DDS, Ph.D<sup>a,b,#</sup>, Li Liu, Ph.D<sup>c</sup>, Yili Qu DDS, PhD<sup>a,b\*</sup>,  
651 Yi Man DDS, PhD<sup>a,b\*</sup>

652 <sup>a</sup> Department of Oral Implantology, West China Hospital of Stomatology, Sichuan University, Chengdu, Sichuan 610041, China

653 <sup>b</sup> State Key Laboratory of Oral Diseases, West China Hospital of Stomatology, Sichuan University, Chengdu, Sichuan 610041, China

654 <sup>c</sup> State Key Laboratory of Biotherapy and Laboratory, West China Hospital, Sichuan University, and Collaborative Innovation Center for  
655 Biotherapy, Chengdu, Sichuan, 610041, China

656 <sup>#</sup> These authors contribute equally to this work

657 <sup>\*</sup> Correspondence to Associate Professor Yili Qu (Email:qqyli@126.com) and Professor and Chair Yi Man (manyi780203@126.com)

658 **Materials and methods**

659 **Electrospinning of polymer scaffolds**

660 We used poly(lactic-co-glycolic acid) (PLGA) (LA/GA = 75:25, Mw = 105 kDa, dispersity is  
661 1.897) produced by Jinan Daigang Biomaterial Co., Ltd. (Shandong, China) and FC (from  
662 fish scale and skin) obtained from Sangon Biotech Co., Ltd. (Shanghai, China) to fabricate  
663 scaffolds by electrospinning. The PLGA (20% w/v) and FC (2% w/v) solution (dissolved in  
664 1,1,1,3,3,3-Hexafluoro-2-propanol (HFIP) solvent (Aladdin Co., Ltd. (Shanghai, China))  
665 were loaded into a plastic syringe fitted with a flat-tipped 21G needle (inner  
666 diameter=0.5mm). A high voltage of 7kV and a distance of 16 cm were applied between  
667 the needle and the collector. For randomly oriented fibers (Random group), the  
668 electrostatically charged fiber was ejected toward the grounded flat collector in the high  
669 electric field, forming a membrane deposited on the aluminium foil. For the Latticed group,  
670 an electroconductive chess-like wire net was used as the collector. For the Aligned group,  
671 the rotational speed of the collecting drum is set at 2800rpm. Finalized scaffolds were  
672 approximately 30–90 µm in thickness. To crosslink FC, the membranes were immersed in  
673 50 mM of EDS/NHS and 10 mM of MES ethanol solution for 24 h at 4 °C. Then  
674 membranes were washed three times with ethanol and dried in vacuum oven for 24 h.  
675 Subsequently, the prepared membranes were sterilized by γ-irradiation for in vitro and in  
676 vivo experiments.

677 **Characterization of scaffolds**

678 Scanning electron microscopy (SEM; JEOL, JSM-6510LV, Japan) was employed to

679 observe the surface morphology of the electrospun membranes. Image-Pro Plus was  
680 applied to quantitatively measure the fiber diameter and distribution from the SEM images  
681 obtained. The surface wetting behavior of the membranes were characterized by  
682 measuring the water contact angles (Chengde Dingsheng, JY-82B, China). Five samples  
683 were tested for each type of membrane to obtain an average value. The tensile properties  
684 of the membranes were tested under a constant upper clamp at speed of 15 mm/min. All  
685 tensile tests follow the criteria of “Plastics-Determination of tensile properties of films”  
686 (GB/T 1040.3–2006, corresponding with ISO 1184–1983). The elastic modulus was  
687 calculated from the slope of the linear region ( $\epsilon = 1\text{--}3\%$ ) of the tensile-stress curve.

#### 688 **Cell culture and cell viability test**

689 L929 mouse fibroblast cells and Human oral keratinocytes (HOK) were used for viability  
690 tests. Cells were cultured in medium containing RPMI 1640 medium (HyClone)  
691 supplemented with 10% fetal bovine serum (Gibco), and were kept at 37°C in humidified 5%  
692 CO<sub>2</sub>/95% air. The cell viability was determined by Cell Counting Kit-8 (CCK-8, Dojindo  
693 Laboratories, Kumamoto, Japan). Electrospun membranes were cut into squares (edge  
694 length=5mm) and placed in the bottom of 96-well plates. L929 cells and HOK cells were  
695 seeded onto membranes at  $4 \times 10^4$  cells/ml. Cells were co-cultured with membranes for 1,  
696 3, and 5 days. 10 $\mu$ l CCK-8 solution was added to each well, and the plates were  
697 incubated at 37 °C for 1h. After incubation, the Abs at 450nm was measured to determine  
698 the cell viability using a micro-plate reader (Multiskan, Thermo, USA).

#### 699 **Experimental model**

##### 700 **Excisional wound model**

701 The protocol of the present experiment was approved by Institution Review Board of West  
702 China Hospital of Stomatology (No. WCHSIRB-D-2017-033-R1) Animals included  
703 Sprague Dawley male rat at ages from 7 to 8 weeks and C57BL/6 male mice at ages from  
704 7 to 9 weeks. Hair at the surgical area was removed. Full-thickness circular excisional  
705 wound (diameter=6mm) was created at the dorsal skin of rats/mice. Random, aligned and  
706 latticed electrospun scaffolds were trimmed into circular shape (diameter=8mm), and  
707 placed below the wound. The control group did not receive any implants (Saline group). A  
708 sterile Tegaderm film (3M) was placed above the wound to protect the wound area. Then

709 annular silicone splints (inner diameter=8mm, outer diameter=12mm) were sutured with  
710 the Tegaderm film and underlying skin in order to minimize the contraction of the dorsal  
711 muscle. After healing for 1, 2 and 4 weeks, animals were euthanized for sample harvest.  
712 Using the residual wound as center, a round skin sample (diameter =10mm) containing all  
713 the layers of skin was harvested.

#### 714 **Model for subcutaneous implant placement**

715 The surgical area on dorsal skin was shaved and aseptically prepared. Three horizontal  
716 incisions of approximately 10 mm were made and subcutaneous pockets were created for  
717 membrane implantation. Then random, align and lattice electrospun scaffolds were  
718 implanted into the pockets. After implantation, the incisions were sutured with interrupted  
719 sutures. After recovering for 3, 5 and 7 days, samples of scaffolds and whole layer of skin  
720 around surgical sites were together harvested.

#### 721 **Specimen harvest for scRNA-seq**

722 We obtained skin samples by cutting off skin at the wound area (circular, diameter=10mm).  
723 Subcutaneous tissues were removed. A total of four tissues were harvested in each group.  
724 The tissues were washed in a 100 mm petri dish containing 20 ml of phosphate-buffered  
725 saline (PBS). Then they were transferred to a 50 mm petri dish containing 100 $\mu$ L of  
726 Enzyme G (Epidermis Dissociation Kit mouse, Miltenyi) and 3.9 ml of PBS buffer with the  
727 dermal side facing downwards. Tissues were digested for 16 hours at 4°C. Then they  
728 were transferred into a 50 mm petri dish containing 4mL of 1 $\times$ Buffer S (Miltenyi).  
729 Epidermis was peeled off from the skin using tweezers, and was cut into pieces. Enzyme  
730 mix containing 3.9 ml of 1 $\times$ Buffer S, 100  $\mu$ l of Enzyme P, and 20  $\mu$ l of Enzyme A (Miltenyi)  
731 stored in a gentleMACS™ C Tube was used to digest the epidermis pieces for 20 minutes  
732 at 37°C. Stop enzymatic reaction by adding 4 ml of PBS that contain 0.5% bovine serum  
733 albumin (BSA). A gentleMACS Dissociator (Miltenyi) was applied to automatically  
734 dissociate the epidermis (Program B). The sample was passed through a 70 $\mu$ m cell  
735 strainer (Corning), centrifuged at 300 $\times$ g for 10 minutes at room temperature, and  
736 resuspended with PBS that contain 0.5% BSA. Cells were gently washed twice and stored  
737 in an ice box. For the dermis part, they were first cut into pieces (diameter < 1mm). The  
738 tissue was mixed with 10ml enzyme mix containing Type I Collagenase (3125u/mL)

739 (Gibco) and 2.5ml trypsin (Gibco), and poured into a gentleMACS™ C Tube. After  
740 dissociating the tissue on gentleMACS Dissociator for 37s (Skin mode), another 10ml  
741 enzyme mix was added. The sample was digested for 2.5 hours at 37°C in a rotary  
742 machine (Pepqlab). Then the dermis sample was passed through a 70µm cell strainer  
743 (Corning), centrifuged at 300×g for 5 minutes at room temperature, and resuspended with  
744 3ml red blood cell lysis buffer (Solarbio). After 3 minutes, the cell suspension was  
745 centrifuged and gently resuspended with RPMI 1640 medium (Hyclone). Cells were gently  
746 washed twice with PBS containing 0.5% BSA and stored in an ice box. The epidermis and  
747 dermis cell solutions were mixed together as a whole. The sample was centrifuged, and  
748 resuspended with 100 µl Dead Cell Removal MicroBeads (Miltenyi). After incubation for  
749 15min at room temperature, the cell suspension was diluted in 3ml 1×Binding buffer  
750 (Miltenyi). LS columns (Miltenyi) were used for removal of dead cells and debris. The  
751 negatively selected live cells pass through the column, and were resuspended with PBS  
752 containing 0.05% BSA. Finally, we proceeded with the 10x Genomics® Single Cell  
753 Protocol.

#### 754 **Single-cell encapsulation and library generation**

755 Single cells were encapsulated in water-in-oil emulsion along with gel beads coated with  
756 unique molecular barcodes using the 10x Genomics Chromium Single-Cell Platform. For  
757 single-cell RNA library generation, the manufacturers' protocol was performed. (10×Single  
758 Cell 3' v3) Sequencing was performed using a Illumina 1.9 mode with 94574 reads per cell.  
759 The Cell Ranger software was used to align reads and generate expression matrices for  
760 downstream analysis.

#### 761 **Computational analysis**

762 Sequence alignment, filtering, normalization, and scaling

763 Alignment was performed with STAR through the Cell Ranger pipeline. Filtering,  
764 normalization, and scaling were performed using Seurat. Cells with UMI counts for fewer  
765 than 200 genes and genes with expression in less than 3 cells were both dropped from  
766 analysis. Following that, cell filtering was conducted to remove cells with high percent of  
767 mitochondrial genes (more than 30%) and hemoglobin genes (more than 5). Data were  
768 then normalized by  $Enorm = \log(UMI \cdot 10,000 / UMI_{total})$ , where  $UMI_{total}$  is total UMI

769 expression for each cell. Scaling was performed to remove unwanted effects correlated to  
770 batch and cell cycle.

### 771 **RNA-seq analysis**

772 The bulk-seq analysis was carried out by Novogene Corporation (Beijing, China). RNA  
773 was extracted from tissues or cells using standard methods to make sure samples were  
774 strictly controlled for quality. The standard procedure mainly included the following three  
775 aspects: analysis of sample RNA integrity, DNA contamination and detection of RNA purity  
776 (OD260/280 and OD260/230). In terms of library construction and quality control, mRNA  
777 can be obtained in two main ways: firstly, most eukaryotes' mRNA has poly A-tailed  
778 structural, and poly A-tailed mRNA can be enriched by Oligo (dT) magnetic beads. The  
779 other is the removal of ribosomal RNA from the total RNA to obtain mRNA. Subsequently,  
780 the obtained mRNA was randomly interrupted by divalent cations in NEB Fragmentation  
781 Buffer, and the database was constructed according to the NEB general database  
782 construction method or chain specific database construction method. Upon completion of  
783 library construction, a Qubit2.0 Fluorometer was used for initial quantification, and the  
784 library was diluted to 1.5ng/ul. Then the insert size of the library was detected using  
785 Agilent 2100 bioanalyzer. After the insert size met the expectation, the effective  
786 concentration of the library was accurately quantified by qRT-PCR (the effective  
787 concentration of the library higher than 2nM) to ensure library quality. Finally, the libraries  
788 were qualified for sequencing, and Illumina sequencing was performed after pooling the  
789 different libraries according to the requirements of effective concentration and target data  
790 volume, of which the basic principle is Sequencing by Synthesis. Through  
791 z-transformation of Fragments Per Kilobase of transcript per Million mapped reads (fpkm)  
792 of the selected gene, gene expression was analyzed. Sample size for conventional, bulk  
793 RNA-Seq libraries was fixed at 3 biological replicates.

### 794 **Quantitative Real-Time Polymerase Chain Reaction (qPCR).**

795 The harvested in vivo samples were cut into pieces, and homogenated in TRIzol™  
796 Reagent (Cat. #15596026, Invitrogen, Thermo Scientific). The concentration and ratio of  
797 total RNA were detected by NanoPhotometer NP80 (Implen, Westlake Village, CA) at  
798 wavelength of 260 nm and 280 nm. The cDNAs were synthesized using PrimeScript™ RT

799 reagent Kit with gDNA Eraser (Perfect Real Time) (Cat. #RR047A), then amplified by  
800 qPCR with the specific primers (**Tab. 1**). PCR was performed on QuantStudio 3 Real-Time  
801 PCR Systems (ThermoFisher Scientific, Waltham, MA). Each 20  $\mu$ L of PCR mixture  
802 contained 10 $\mu$ l of TB Green Premix Ex Taq (Ti RNaseH Plus) (2X), 0.4 $\mu$ L of PCR Forward  
803 Primer (10 $\mu$ M), 0.4 $\mu$ l of PCR Reverse Primer (10 $\mu$ M), 0.4 $\mu$ l of ROX Reference Dye (50X),  
804 2 $\mu$ l Template and 6.8 $\mu$ l of Sterile purified water. Samples were incubated at 1 cycle of  
805 95°C for 30 s followed by 40 cycles of 95°C for 5 s and 60°C for 34 s, and ended up with a  
806 cycle composing of 95°C for 15 s, 60°C for 1 min and 95°C for 15 s. Results were analyzed  
807 using the comparative CT ( $\Delta\Delta$ CT) method to calculate gene expression fold changes  
808 normalized to the levels of Actin/Gapdh gene transcripts. The experiments were repeated  
809 for three times independently (n=3).

#### 810 **Fluorescence activated Cell Sorting (FACS) analysis**

811 The surface markers of macrophages and their phenotypes were examined by flow  
812 cytometry to evaluate proportion and polarization of macrophages.

813 The in vivo specimens were first cut into pieces (diameter < 1mm). The tissue was mixed  
814 with 10ml enzyme mix containing Type I Collagenase (3125u/mL) (Gibco) and 2.5ml  
815 trypsin (Gibco), and poured into a gentleMACS™ C Tube. After dissociating the tissue on  
816 gentleMACS Dissociator for 37s (Skin mode), another 10ml enzyme mix was added. The  
817 sample was digested for 2.5-3 hours at 37°C in a rotary machine (Peqlab). Then sample  
818 was passed through a 70 $\mu$ m cell strainer (Corning), centrifuged at 300 $\times$ g for 5 minutes at  
819 room temperature. Cells were gently washed twice with PBS containing 0.05% BSA and  
820 stored in an ice box. Then the cell solutions were co-incubated with antibodies against  
821 iNOS (iNOS-PE, Clone 4E5), CD68 (CD68-FITC, Clone Y1/82A), CD11b (PerCP/Cy5.5®,  
822 Clone M1/70) and Mrc1 (Alexa Fluor 647) at 1:400 dilution in the dark for 1 h at 4°C (100 $\mu$ l  
823 per antibody for each sample). All samples were centrifuged at 450RCF for 5 min at 4°C.  
824 Supernatants were removed by aspiration, 1ml 1XPBS solution containing 0.04% bovine  
825 serum albumin (BSA) was used to wash the cells for twice. Each sample was  
826 resuspended in 1ml of 4% paraformaldehyde, and the eventual FACS analysis was  
827 performed on NovoCyte Flow Cytometers (ACEA Biosciences®, San Diego, California)  
828 and FlowJo 10.5.0. The experiments were repeated for three times independently (n=3).

829 **Histological and immunofluorescent staining**

830 The sections were pretreated with 1% bovine serum albumin in PBS containing 0.1%  
831 Triton X 100 for 1 h, incubated in 1% Tween 20 for 20 min and washed again in PBS. The  
832 sections were subsequently analyzed for Krt10 and Krt5, according to the manufacturers'  
833 instructions. Briefly, sections were incubated for 30 min in dark. The excessive dye was  
834 rinsed off with PBS. Sections were incubated with antibody isotype to exclude false  
835 positive staining. Double immunofluorescence staining with primary antibodies against  
836 cytokeratin 10 (ab76318, Abcam, 1:150), cytokeratin 5 (ab52635, Abcam, 1:200) and  
837 secondary antibodies (GB25303, GB21303, Servicebio, 1:400) was performed. The  
838 immunostained specimens were further subjected to Hoechst33258 staining (G1011,  
839 Servicebio). At least three parallel sections were observed with fluorescence microscope  
840 (ZEISS SteREO Discovery.V20, Olympus). The fluorescence area measurement was  
841 conducted on five random sights of regenerated epithelium with CaseViewer 2.1 and  
842 Image Pro Plus 7.0 (n = 5).

843 **Statistical Analysis**

844 Statistical significance for *in vivo* and *in vitro* data of qPCR or FACS were analyzed by  
845 analysis of variance (ANOVA) at the 95% confidence level, which were performed in  
846 GraphPad Prism 8.0 (GraphPad Software, San Diego, CA, USA) and  $P < 0.05$  was  
847 considered statistically significant, while  $P > 0.05$  was considered having no statistical  
848 differences, which was marked with NS.

849

850 **Supplementary data of “Dissecting the microenvironment**  
851 **around biosynthetic scaffolds in murine skin wound healing”**

852 Chen Hu DDS, Ph.D<sup>a,b,#</sup>, Chenyu Chu DDS, Ph.D<sup>a,b,#</sup>, Li Liu, Ph.D<sup>c</sup>, Yili Qu DDS, PhD<sup>a,b\*</sup>,  
853 Yi Man DDS, PhD<sup>a,b\*</sup>

854 <sup>a</sup> Department of Oral Implantology, West China Hospital of Stomatology, Sichuan University, Chengdu, Sichuan 610041, China

855 <sup>b</sup> State Key Laboratory of Oral Diseases, West China Hospital of Stomatology, Sichuan University, Chengdu, Sichuan 610041, China

856 <sup>c</sup> State Key Laboratory of Biotherapy and Laboratory, West China Hospital, Sichuan University, and Collaborative Innovation Center for  
857 Biotherapy, Chengdu, Sichuan, 610041, China

858 <sup>#</sup> These authors contribute equally to this work

859 <sup>\*</sup> Correspondence to Associate Professor Yili Qu (Email:qqyili@126.com) and Professor and Chair Yi Man (manyi780203@126.com)

860



861

fig. S1

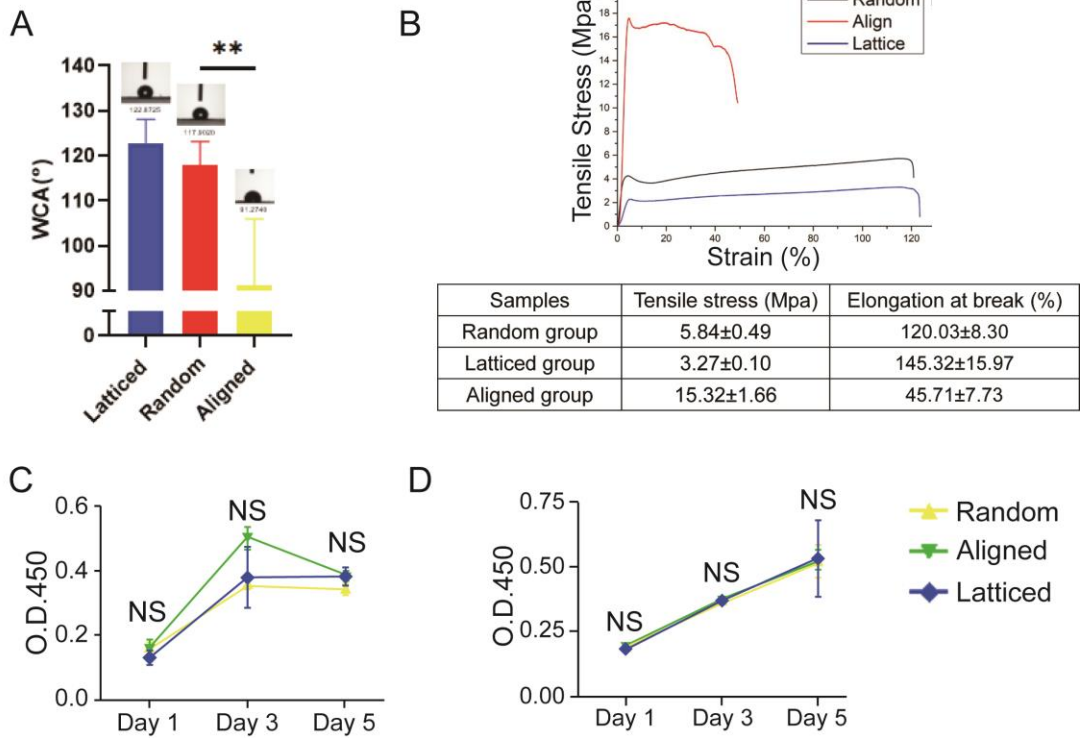

862

863

864

865

866

Fig. S1 Biophysical properties of electrospun membranes. (A) Water contact angle test. (B) Tensile stress test. (C) Viability of HOK (human oral keratinocyte) cells seeded on the membranes. (D) Viability of L929 (mouse fibroblast) cells seeded on the membranes.

fig. S2

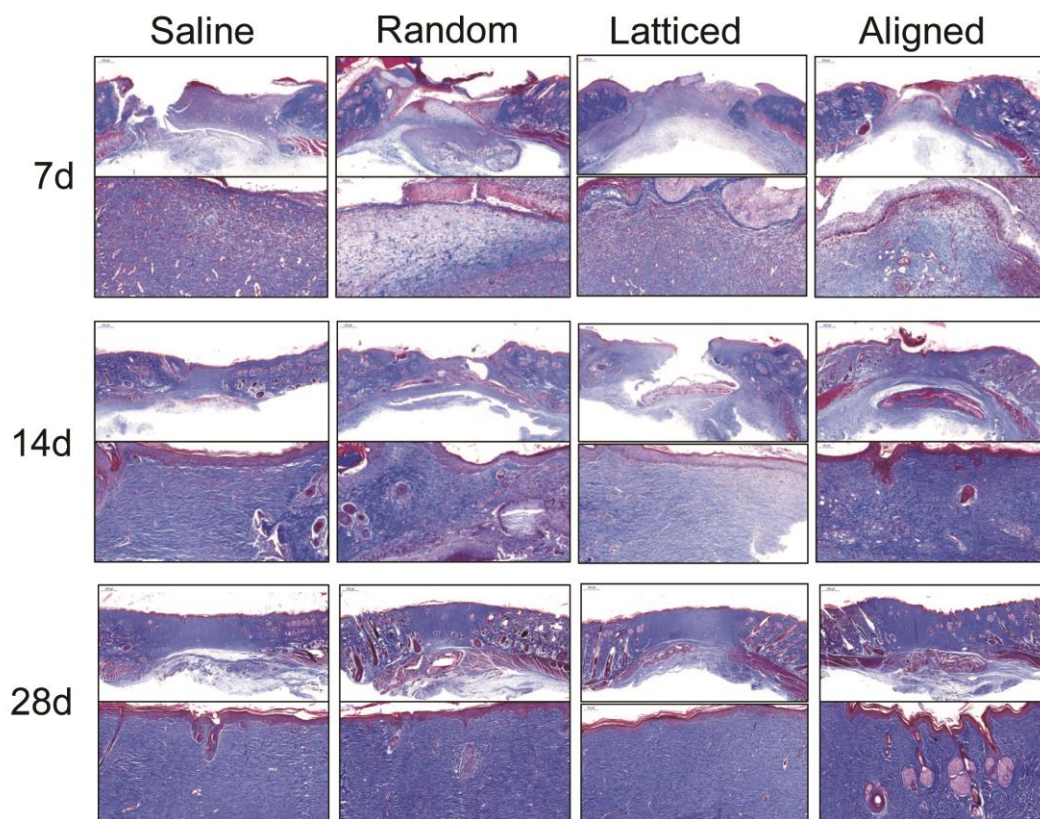

867

868

Fig. S2 Masson's trichrome staining for rat skin samples on day 7, 14, and 28.

869

870

fig. S3

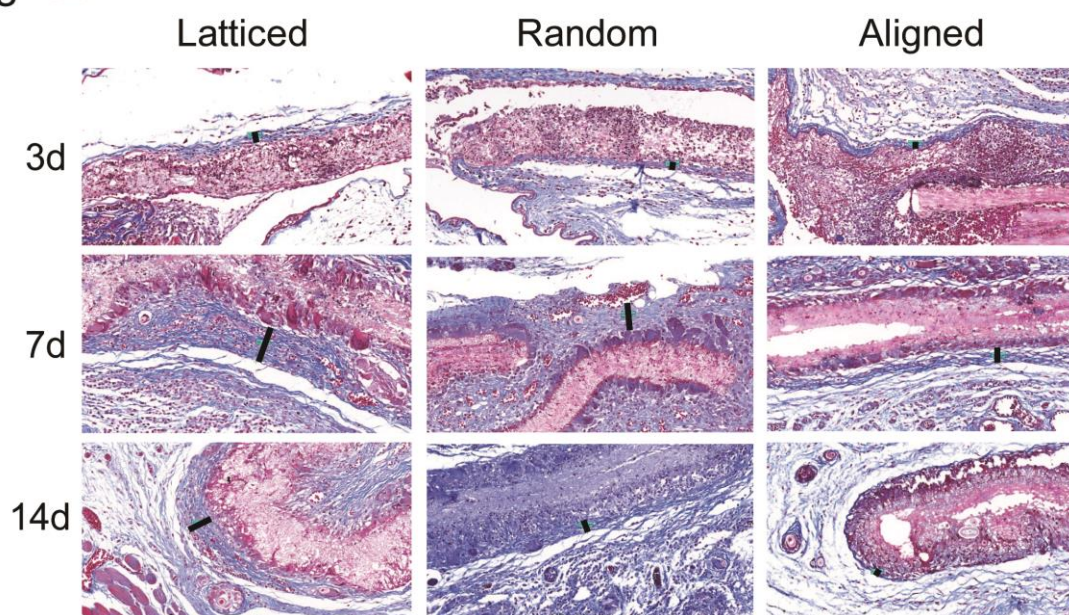

871

872 Fig. S3 Fibrotic capsule formation around three types of scaffolds over 14 days. (Rat)

873

874

fig. S4

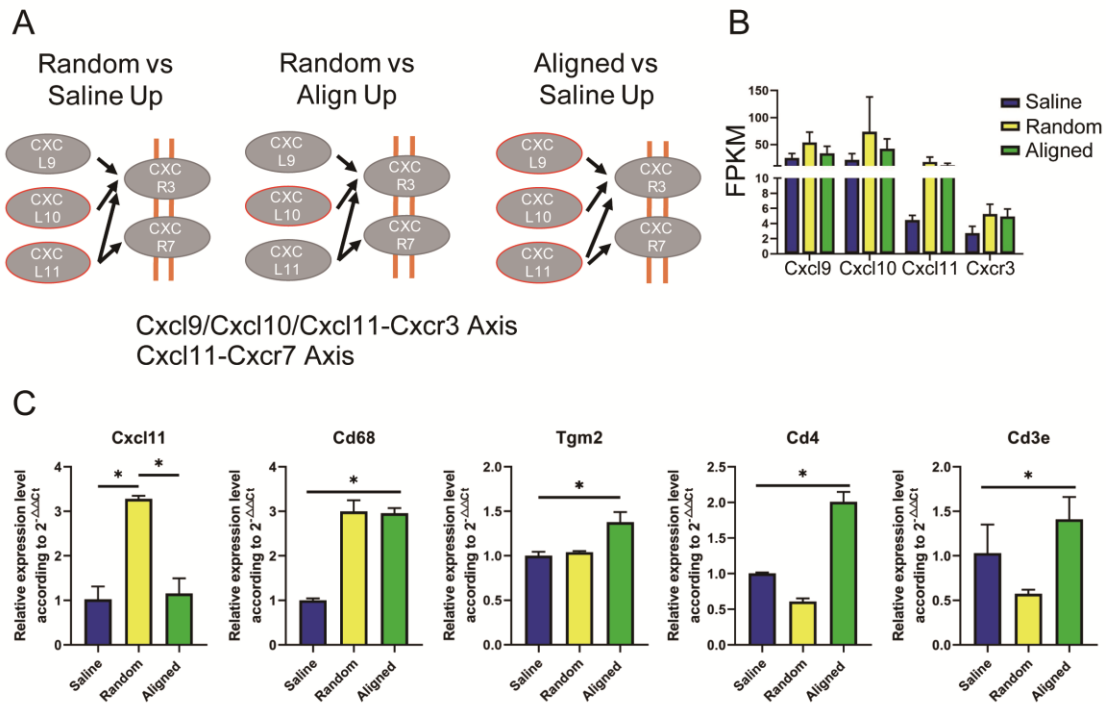

875

876

877

878

879

Fig. S4 RNA-seq analysis for rat skin samples. (A) KEGG analysis revealed up-regulated gene loci in the CXCL9, -10, -11/CXCR3 axis. (B) Normalized gene expression (FPKM) of CXCL9, -10, -11 and CXCR3. (C) Evaluation of related gene expression using qPCR.

880

fig. S5

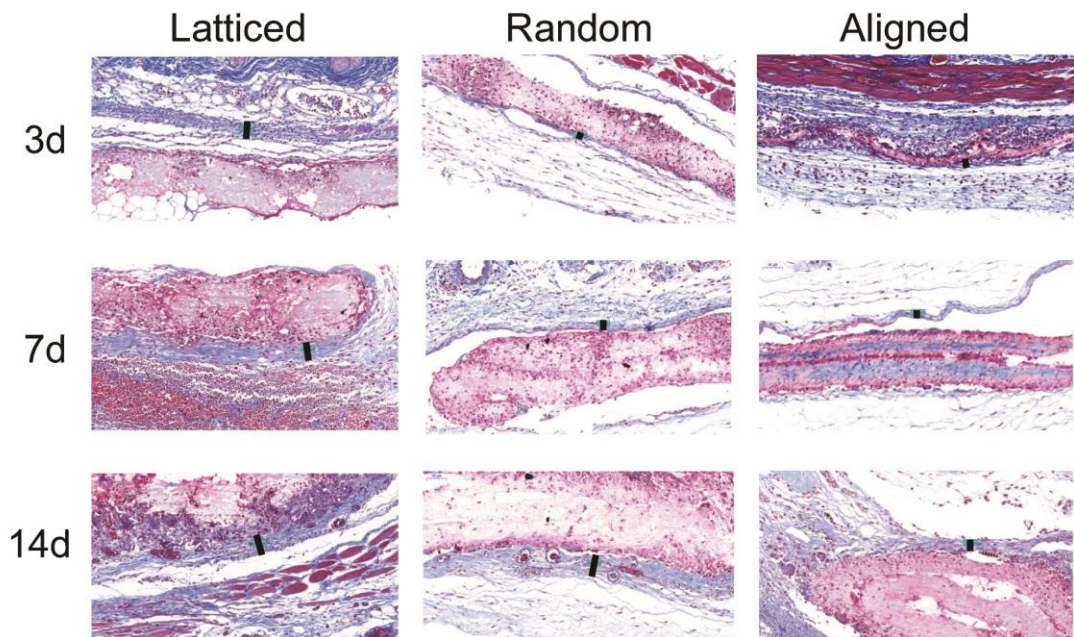

881

882

Fig. S5 Fibrotic capsule formation around three types of scaffolds over 14 days. (Mouse)

fig. S6

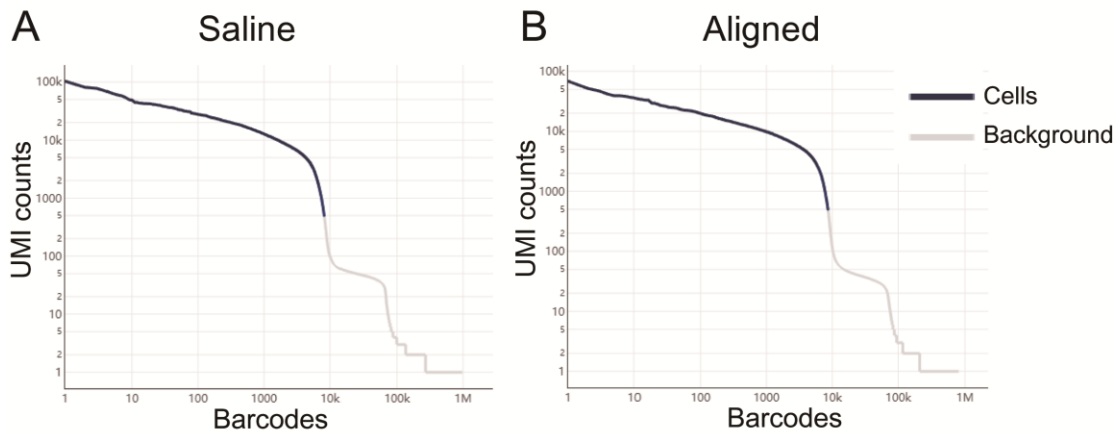

Mean reads per cell: 16283  
 Median genes per cell: 1704  
 Total cells after filtering: 8869  
 Total read no.: 106374119  
 Valid barcodes: 96.6%  
 > 91.41% Q30 bases across all bases

Mean reads per cell: 12667  
 Median genes per cell: 1475  
 Total cells after filtering: 8312  
 Total read no.: 106374119  
 Valid barcodes: 96.6%  
 > 91.20% Q30 bases across all bases

C

|                               | Saline    | Aligned   |
|-------------------------------|-----------|-----------|
| CellRanger estimated cell no. | 8982      | 9593      |
| Mean reads per cell           | 94573     | 83579     |
| Median genes per cell         | 3175      | 2986      |
| Fraction of reads in cells    | 93.2%     | 93.5%     |
| Total genes detected          | 21129     | 21178     |
| Median UMI counts per cell    | 14847     | 13319     |
| Total read no.                | 849460560 | 801780646 |
| Valid barcode %               | 96.7%     | 96.7%     |
| Sequencing saturation         | 66.0%     | 66.3%     |
| Q30 Bases in Barcode          | 94.8%     | 94.8%     |
| Q30 Bases in RNA read         | 91.4%     | 91.2%     |
| Q30 Bases in UMI              | 94.4%     | 94.3%     |

883

884 Fig. S6 Quality control of scRNAseq data. Number of UMI counts per barcodes identified  
 885 in CellRanger software.

fig. S7

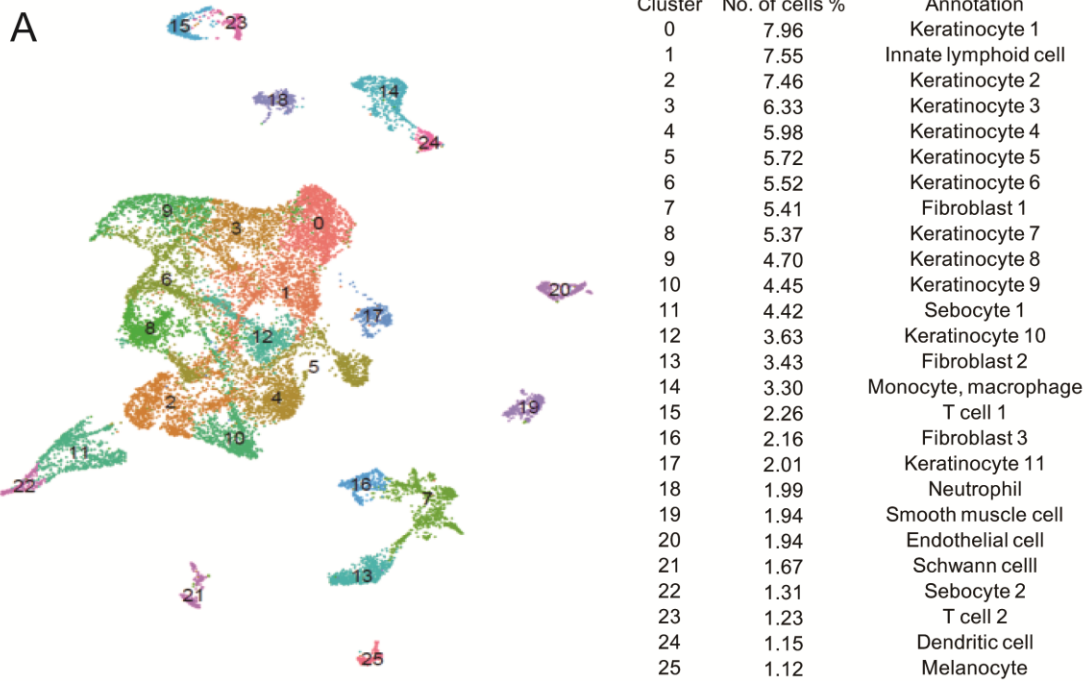

886

887 Fig. S7 Unsupervised clustering using Seurat categorized the cells into 26 clusters based  
888 on global gene expression patterns.

889

890
